1 **Long title: Molecular mechanisms involved in Atlantic halibut (*Hippoglossus hippoglossus*) egg**  
2 **quality: impairments at transcription and protein folding levels induce inefficient protein and**  
3 **energy homeostasis during early development**

4

5 **Short title: Molecular mechanisms involved in Atlantic halibut (*Hippoglossus hippoglossus*) egg**  
6 **quality**

7

8 Ozlem Yilmaz<sup>1\*</sup>, Anders Mangor Jensen<sup>1</sup>, Torstein Harboe<sup>1</sup>, Margareth Møgster<sup>1</sup>, Ragnfrid Mangor  
9 Jensen<sup>1</sup>, Olav Mjaavatten<sup>2</sup>, Even Birkeland<sup>2</sup>, Endy Spriet<sup>3</sup>, Linda Sandven<sup>3</sup>, Tomasz Furmanek<sup>4</sup>, Frode  
10 S. Berven<sup>2</sup>, Anna Wargelius<sup>4</sup> and Birgitta Norberg<sup>1</sup>

11

12 <sup>1</sup>Institute of Marine Research, Austevoll Research Station, 5392, Storebo Norway

13 <sup>2</sup>The Proteomics Facility of the University of Bergen (PROBE), 5009 Bergen, Norway

14 <sup>3</sup>The Molecular Imaging Center (MIC), University of Bergen, 5009, Bergen, Norway

15 <sup>4</sup>Institute of Marine Research, P.O. Box 1870, Nordnes, NO-5817, Bergen, Norway.

16 email: ozlem.yilmaz@hi.no

17

18 **Molecular mechanisms involved in Atlantic halibut (*Hippoglossus hippoglossus*) egg quality**

19

20 Ozlem Yilmaz<sup>1\*</sup>, Anders Mangor Jensen<sup>1</sup>, Torstein Harboe<sup>1</sup>, Margareth Møgster<sup>1</sup>, Ragnfrid Mangor  
21 Jensen<sup>1</sup>, Olav Mjaavatten<sup>2</sup>, Even Birkeland<sup>2</sup>, Endy Spriet<sup>3</sup>, Linda Sandven<sup>3</sup>, Tomasz Furmanek<sup>4</sup>, Frode  
22 S. Berven<sup>2</sup>, Anna Wargelius<sup>4</sup> and Birgitta Norberg<sup>1</sup>

23

24 <sup>1</sup>Institute of Marine Research, Austevoll Research Station, 5392, Storebo Norway

25 <sup>2</sup>The Proteomics Facility of the University of Bergen (PROBE), 5009 Bergen, Norway

26 <sup>3</sup>The Molecular Imaging Center (MIC), University of Bergen, 5009, Bergen, Norway

27 <sup>4</sup>Institute of Marine Research, P.O. Box 1870, Nordnes, NO-5817, Bergen, Norway.

28 email: ozlem.yilmaz@hi.no

29

30

31 **ABSTRACT**

32 **Background**

33 Reproductive success and normal development in all animals are dependent on egg quality and  
34 developmental competence of the produced embryo. This study employed tandem mass tags labeling  
35 based liquid chromatography tandem mass spectrometry for egg proteomic profiling to investigate  
36 differences in the global proteome of good versus poor quality Atlantic halibut eggs at 1-cell stage post  
37 fertilization.

38

39 **Results**

40 A total of 115 proteins were found to be differentially abundant between good and poor quality eggs.  
41 Frequency distribution of these proteins revealed higher protein folding activity in good quality eggs in  
42 comparison to higher transcription and protein degradation activities in poor quality eggs ( $p < 0.05$ ).  
43 Poor quality halibut eggs were significantly enriched with additional proteins related to mitochondrial  
44 structure and biogenesis ( $p < 0.05$ ). The differential abundance of a selection of proteins was first  
45 confirmed at gene expression level using a transcriptomic approach followed by a targeted proteomic

46 approach (parallel reaction monitoring based mass spectrometry) in biological samples obtained from  
47 two consecutive reproductive seasons. The findings of global proteome profiling, together with the  
48 validation of differential abundance of targeted proteins and their related genes, suggest impairments in  
49 protein and energy homeostasis which might be related to unfolded protein response and mitochondrial  
50 stress in poor quality eggs. Additional transmission electron microscopy studies were taken to assess  
51 potential differences in abundance and morphological integrity of mitochondria between good and poor  
52 quality eggs. Observations reveal poor quality eggs to contain significantly higher number of  
53 mitochondria with higher number of cristae. These mitochondria, however, are significantly smaller  
54 and have a more irregular shape than those found in high-quality eggs. Therewithal difference in  
55 mtDNA levels represented by *mt-nd5* and *mt-atp6* genomic DNA abundance in this study, were found  
56 to be not statistically significant ( $p > 0.05$ ) between good and bad quality eggs at both 1 hpf and 24 hpf  
57 stages.

58

## 59 **Conclusion**

60 Overall evidence from this study indicate that poor quality eggs undergo impairments at both  
61 transcription and translation level leading to endoplasmic reticulum and mitochondrial deficiencies.  
62 Additional research may be required to expediate the details and the potential of these impairments  
63 occurring in different species. Nonetheless, this study will pave the way for future research and will  
64 help in acceleration of recent advances in the field of embryonic developmental competence of living  
65 organisms.

66

67

68 **Key words:** egg quality, Atlantic halibut, proteomics, mitochondria, mitochondrial DNA, protein  
69 folding,

70

71

72

73

## 74 BACKGROUND

75 Egg quality is of pivotal importance in biomedicine, agriculture, ecology and environmental  
76 science because of its tremendous influence on reproductive success or failure in all animals. Poor egg  
77 quality remains a serious problem of largely variable cause(s) in human reproductive medicine (1,2)  
78 (Tarin et al., 2014, Keefe et al., 2014) and livestock production (3–5) (Kjorsvik et al., 1990, Bobe and  
79 Labbe, 2010, Migaud et al., 2013). Maternal factors, primarily mRNA and proteins deposited in the egg  
80 during ovarian expansion and maturation, are among the key influences on fertility and early  
81 embryogenesis. Recent research focus has been increasingly devoted to investigating the motherload of  
82 maternal mRNA and proteins deposited in the egg for clues to the origin of egg quality problem and  
83 possible solutions (6–13) (Aegerter et al., 2005, Bonnet et al. 2007, Mommens et al. 2014, Chapman et  
84 al. 2014, Sullivan et al., 2015, Zarski et al., 2017, Cheung et al., 2019, Ma et al., 2019). In vertebrates  
85 the maternal RNA stockpile and proteins drive the early embryonic development until activation of the  
86 zygotic genome around mid-blastula stage (14,15) (Tadros and Lipshitz, 2009, Jukam et al., 2018).  
87 Differential abundance of maternal transcripts may be indicators of quality in fish eggs (9) (Chapman  
88 et al., 2014), however, certain molecular changes such as the modification of proteins after their uptake  
89 into growing oocytes play crucial roles in many aspects of early development. These roles are not  
90 possible to determine using transcriptomic technologies and need application of proteomics, an  
91 approach representing the dynamic transfer of genetic information into the actual effector molecules in  
92 the cell, for elucidation of ongoing cellular events prior to zygotic genome activation. Despite the  
93 restricted consistency between transcript and product protein abundances (16) (Groh et al., 2011)  
94 validation of proteomic changes via transcriptomic approaches may also be applied in steady-state  
95 cellular mechanisms at early stages of development.

96 Proteomic profiling has been widely employed to study the cell biology of oocytes in many  
97 species, including humans, mice, pigs, fish and insects (17) (Chapovetsky et al., 2007), but it has been  
98 less than two decades since it has been considered as a useful and practical tool to study fish egg quality,  
99 i.e. rainbow trout (*Oncorhynchus mykiss*) (18) (Rime et al., 2004), European sea bass (*Dicentrarchus*  
100 *labrax*) (19) (Crespel et al., 2008), Eurasian perch (*Perca fluviatilis*) (20) (Castets et al., 2012), and  
101 hapuku (*Polyprion oxygeneios*) (21) (Kohn et al., 2015). Our recent research comparing the global

102 proteomes of different quality eggs from zebrafish revealed a number of proteins as potential markers,  
103 but more importantly, several molecular mechanisms and related physiological processes to be  
104 associated with egg quality in this species (22) (Yilmaz et al., 2017). In a most up to date study, the  
105 consecutive changes in global proteome of 1-cell-stage egg after invalidation of certain types of Vtgs  
106 (*vtg1*, 4 and 5; *vtg1*-KO and *vtg3*; *vtg3*-KO) were investigated using CRISPR/Cas9 genome editing  
107 technology (23,24) (Yilmaz et al., 2019, Yilmaz et al., 2021). The collective results of these studies  
108 delivered a clear portrait of the impaired molecular mechanisms that impacts egg and offspring  
109 developmental competence with striking similarities between *vtg*-KO and poor quality egg proteome  
110 profiles in zebrafish.

111 Despite species specific differences in physiological aspects of early development, the  
112 evolutionary conserved stereotypical procedure of cellular events, led us to investigate whether these  
113 findings are common with marine species of aquaculture interest. Atlantic halibut (*Hippoglossus*  
114 *hippoglossus*) a highly prized species in global fish markets with decreasing landings in capture  
115 fisheries and increasing demand to its production is considered as a representative of such species.  
116 Notwithstanding the progress in research and cultivation efforts that has been made recently, several  
117 persisting bottlenecks (i.e. the unsteady supply of high quality eggs and fry) still restrain expansion of  
118 sustainable commercial production of Atlantic halibut. As a batch spawner releasing up to 10 batches  
119 of eggs with highly variable quality at 2-3 days intervals during each reproductive cycle halibut is a  
120 perfect candidate to study egg quality related mechanisms.

121 Therefore, the objectives of this study were 1) to reveal the proteomic profiles of good versus  
122 poor quality eggs, 2) to identify proteins that can serve as egg quality markers, and 3) to discover  
123 molecular mechanisms determining egg quality using a combination of the most advanced proteomics  
124 approaches such as tandem mass tags (TMT) labeling and parallel reaction monitoring (PRM) based  
125 liquid chromatography tandem mass spectrometry (LC-MS/MS) practices. Discoveries of such  
126 mechanisms in poor quality eggs will spur development of practical strategies to determine and  
127 eliminate the potential causes leading to egg quality problems in Atlantic halibut and other farmed  
128 fishes, thereby contributing significantly to development of effective strategies for improving breeding  
129 practices and sustainable growth of Norwegian and global aquaculture. The findings of this study will

130 also contribute considerably to recent advancements in reproductive biology of other living organisms,  
131 such as animals and humans, that share common properties of existence and cellular events.

132

## 133 **RESULTS**

134

135 The egg batches from halibut females employed in this study showed high variation in  
136 fecundity, buoyancy, fertilization, and normal cell division ratios with no obvious link to the embryo  
137 survival ratio prior hatching at 12 days post fertilization (dpf) (**Table S1, Fig S1**). As a result, despite  
138 the high percentage of fertilization and embryo going through normal cell division processes, poor  
139 quality eggs exhibited low embryo survival rates. Based on our overall experience in hatchery practices,  
140 the cumulative percent of embryo survival for all batches stabilized prior hatching (by 12 dpf).  
141 Therefore, embryo survival at this stage was utilized as the measure of egg quality in this study. The  
142 actual survival rates in the overall samples inventory ranged from 93 % for good quality eggs and 25 %  
143 for the poor quality eggs. Due to yearly changes in this index the survival difference window between  
144 good and poor quality egg batches were not possible to standardize. Therefore, egg batches with embryo  
145 survival rate of  $\geq 76$  were considered to be of good quality and those spawns with  $\leq 62$  embryo survival  
146 were considered to be of poor quality in 2019. This ratio was  $\geq 76$  % and  $\geq 70$  % for good quality egg  
147 batches, and  $\leq 71$  and  $\leq 55$  for poor quality egg batches in the years 2020 and 2021, respectively.

148

### 149 **TMT labeling based LC-MS/MS**

150 A total of 1619 out of 1886 identified proteins were considered as valid based on filtering to be  
151 present in at least four biological samples. A total of 115 of valid proteins were found to be differentially  
152 abundant between good and poor quality eggs (Independent samples t-test,  $p < 0.05$  followed by  
153 Benjamini Hochberg correction for multiple testing,  $p < 0.05$ ). Detailed information on these proteins  
154 is given in **Table S2**. In this study, proteins with higher abundance in good quality eggs are indicated  
155 as down-regulated in poor quality eggs ( $N = 64$ ), and those with higher abundance in poor quality eggs  
156 are indicated as up-regulated in poor quality eggs ( $N = 51$ ). **Fig 1A** demonstrates hierarchical clustering  
157 of these proteins based on  $p$  values obtained from Student's t-test,  $p < 0.05$  followed by Benjamini

158 Hochberg correction for multiple testing,  $p < 0.05$ . A heatmap representation of differentially regulated  
 159 proteins' clustering based on their abundance between good and poor quality eggs is given in **Fig 1B**.  
 160  
 161

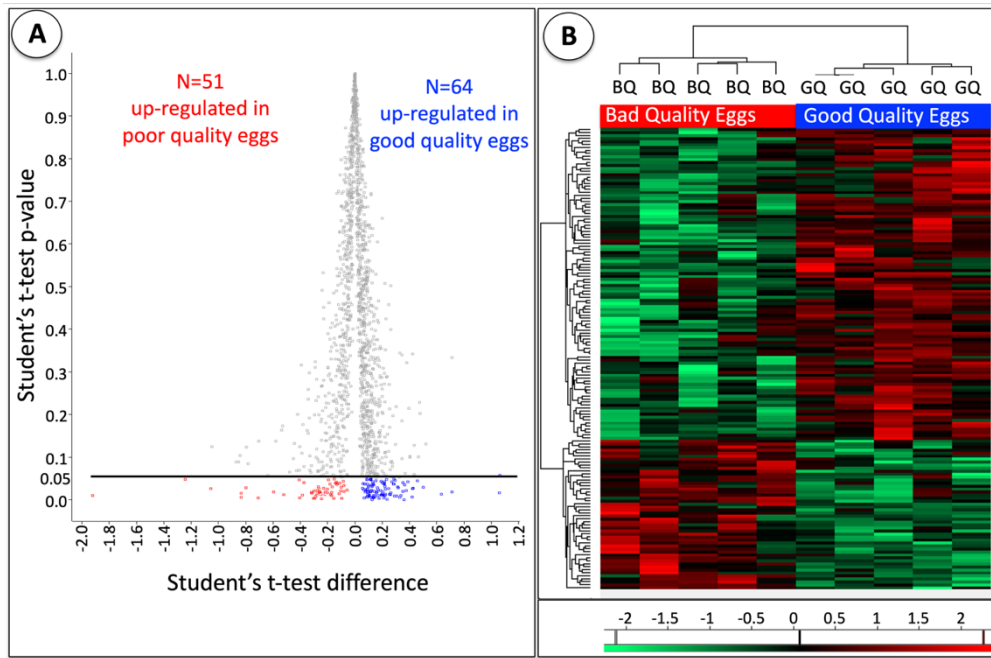

175 **Fig 1. Differentially abundant proteins between good and poor quality halibut eggs. Panel A.**  
 176 Representation of differential abundance for 115 proteins detected by TMT labeling based LC-MS/MS  
 177 based on their Student's t-test significance value. Y axis indicates  $p$  values while X axis represents test  
 178 differences. Proteins up-regulated in poor quality eggs ( $N = 51$ ) are indicated in red while those which  
 179 were up-regulated in good quality eggs (therefore down-regulated in poor quality eggs,  $N = 64$ ) are  
 180 indicated in blue. A black horizontal line above red and blue markers representing the separation of  
 181 differentially abundant proteins retained after the  $p < 0.05$  cut off value. A complete list of these proteins  
 182 along with detailed information on their NCBI gene IDs, NCBI accession numbers, associated protein  
 183 names from human database, protein full names, functional categories (according to **Fig 2**), significance  
 184 of differences in abundance (Independent t- test  $p < 0.05$  followed by Benjamini Hochberg correction  
 185 for multiple tests  $p < 0.05$ ), relative abundance ratios (GQ/BQ and BQ/GQ, respectively), and regulation  
 186 tendencies (BQ-upregulated or BQ-downregulated) are given in **Table S2**. **Panel B.** A heatmap  
 187 clustering of differentially abundant proteins between good and poor quality egg groups.

188  
 189  
 190 Frequency distribution of differentially abundant proteins among different thirteen arbitrarily  
 191 chosen functional categories that would account for  $\geq 90$  % of the proteins is given in **Fig 2**.

192 Accordingly, proteins which were down-regulated in poor quality eggs (N = 64) (**Fig 2 Left panel;**  
193 **Good Quality Eggs**) were mainly related to cell cycle, division, growth and fate (26 %), protein folding  
194 (14 %), energy metabolism (12 %), translation (11 %), protein transport (8 %), lipid metabolism (8 %)  
195 with the remaining categorized proteins being related to protein degradation and synthesis inhibition (5  
196 %), transcription (5 %), mitochondrial biogenesis (5 %), metabolism of cofactors and vitamins (3 %),  
197 Redox/detox related (1%). Two percent of proteins which were down-regulated in poor quality eggs  
198 were placed in the category of ‘others’. Proteins which were up-regulated in poor quality eggs (N = 51)  
199 (**Fig 2 Right panel; Poor Quality Eggs**) were mainly related to cell cycle, division, growth and fate  
200 (19 %), protein degradation and synthesis inhibition (18 %), mitochondrial biogenesis (17 %),  
201 transcription (16 %), energy metabolism (8 %), protein transport (8 %) with the remaining categorized  
202 proteins being related to lipid metabolism (4 %), protein folding (2 %), translation (2 %), Redox/detox  
203 related (2), immune response related (2%). Two percent of proteins which were up-regulated in poor  
204 quality eggs were placed in the category of ‘others’. The distribution of these differentially regulated  
205 proteins among functional categories significantly differed between egg quality groups ( $\chi^2 p < 0.05$ ).  
206 Accordingly, good quality eggs seem to contain significantly higher number of proteins related to  
207 protein folding (14 %), while poor quality eggs contain significantly higher number of proteins related  
208 to transcription (16 %), protein degradation and synthesis inhibition (18 %), and mitochondrial  
209 biogenesis (17 %) (**Fig 2**).

210

211



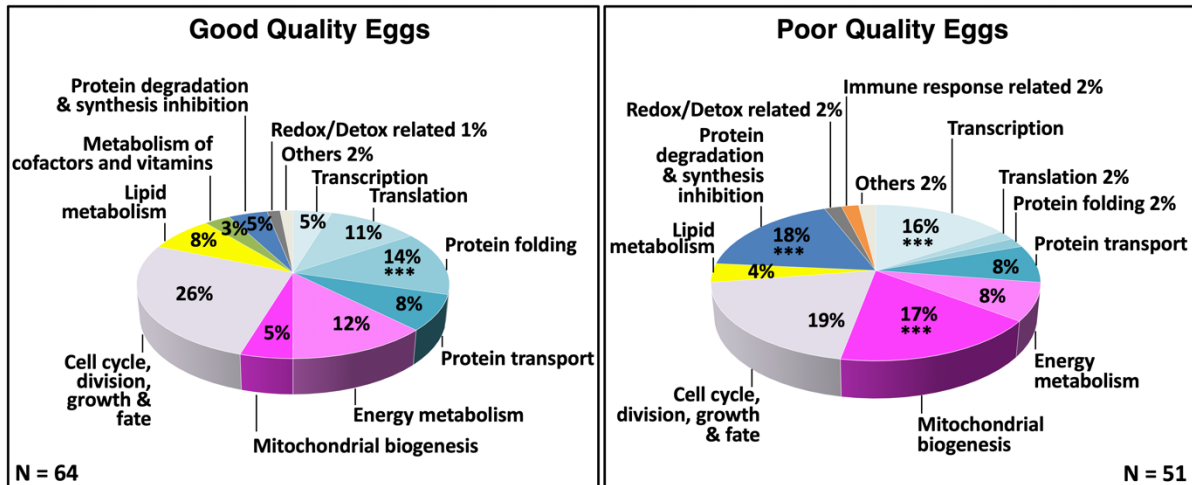

212 **Fig 2. Distribution of differentially abundant proteins among functional categories. Panel A.**  
 213 Proteins up-regulated in good quality eggs (N = 64), therefore down-regulated in poor quality eggs.  
 214 **Panel B.** Proteins up-regulated in poor quality eggs (N = 51). The overall distribution of differentially  
 215 regulated proteins among the functional categories significantly differed between good and poor quality  
 216 eggs ( $\chi^2$ ,  $p < 0.05$ ). Asterisks indicate significant differences between different groups in the proportion  
 217 of differentially regulated proteins within a functional category ( $\chi^2$ ,  $p < 0.05$ ). The corresponding NCBI  
 218 gene IDs, NCBI accession numbers, associated protein names from human database, protein full names,  
 219 functional categories (shown above), significance of differences in abundance (Independent t- test  $p <$   
 220 0.05 followed by Benjamini Hochberg correction for multiple tests  $p < 0.05$ ), relative abundance ratios  
 221 (GQ/BQ and BQ/GQ, respectively), and regulation tendencies (BQ-upregulated or BQ-downregulated)  
 222 are given in **Table S2**.

223  
224

225 Gene ontology (GO) enrichment analysis based on overrepresentation test ( $p < 0.05$ ), with the  
 226 human database being used as a reference, revealed significant biological processes, molecular  
 227 functions and cellular components which are in close relation with frequency distribution analysis  
 228 findings. Respectively, biological processes which were overrepresented by proteins down-regulated in  
 229 poor quality eggs were as follows; protein folding, small molecule catabolic process, ribonucleoprotein  
 230 (RNP) complex biogenesis, RNP complex subunit organization, cofactor biosynthetic process,  
 231 coenzyme metabolic process, organophosphate (OP) catabolic process, nuclear transport, nucleobase-

232 containing small molecule biosynthetic process, and RNA catabolic process. Molecular functions which  
233 were mostly overrepresented by poor quality down-regulated proteins were related to isomerase  
234 activity, oxidoreductase activity (acting on the aldehyde or oxo group of donors), oxidoreductase  
235 activity (acting on the CH-CH group of donors), oxidoreductase activity (acting on a sulfur group of  
236 donors), RNP complex binding, kinesin binding, translation factor activity (RNA binding), snRNA  
237 binding, mRNA binding, and Ran GTPase binding. Cellular components overrepresented by these  
238 proteins were RNP complex, Sm-like protein family complex, mitochondrion, cytoplasmic region,  
239 mitochondrial part, cytoplasmic RNP granule, P-body, mitochondrial matrix, neuron projection  
240 cytoplasm, and tertiary granule lumen. KEGG pathways that were significantly overrepresented by the  
241 same set of proteins were RNA degradation, metabolic pathways, fatty acid degradation, valine, leucine  
242 and isoleucine degradation, glycolysis/gluconeogenesis, necroptosis, propanoate metabolism, glycine,  
243 serine and threonine metabolism, tryptophane metabolism, and ferroptosis (**Fig 3A, 3B, 3C and 3D**  
244 **Left panels**).

245

# Gene Ontology Enrichment Analysis

**Enrichment Method:** Overrepresentation  
**Database:** Human  
**FDR Method:** Benjamini Hochberg  
**Significance Level:**  $p < 0.05$

## A Biological Processes

**Good Quality Eggs**

**Poor Quality Eggs**

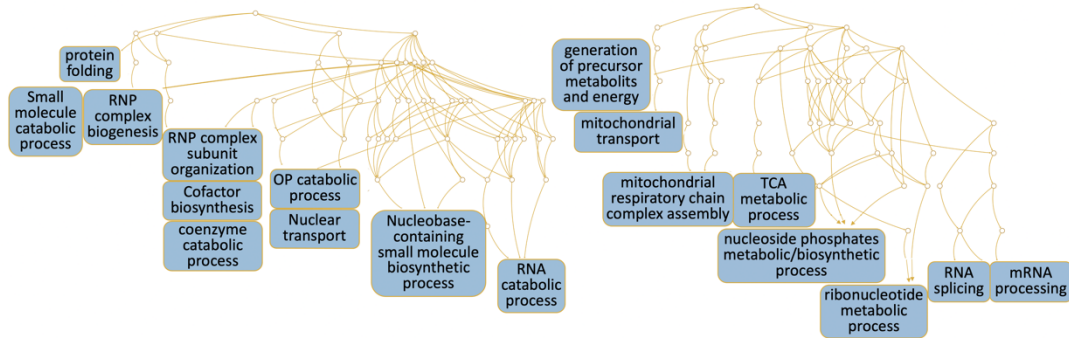

## B Molecular Functions

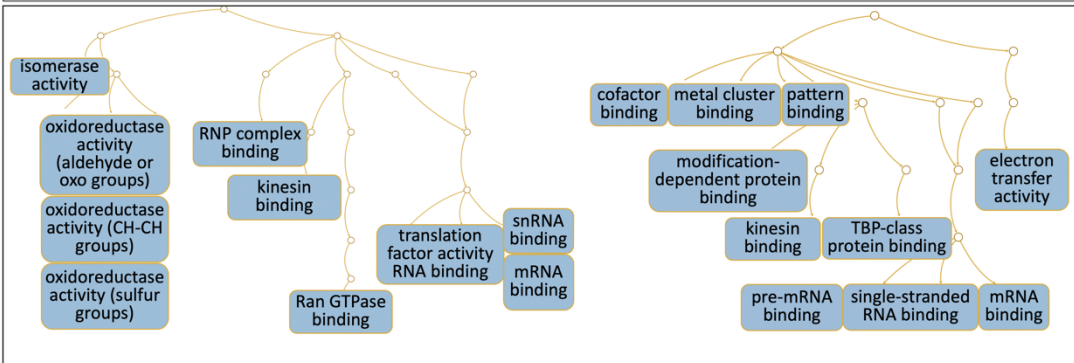

## C Cellular Components

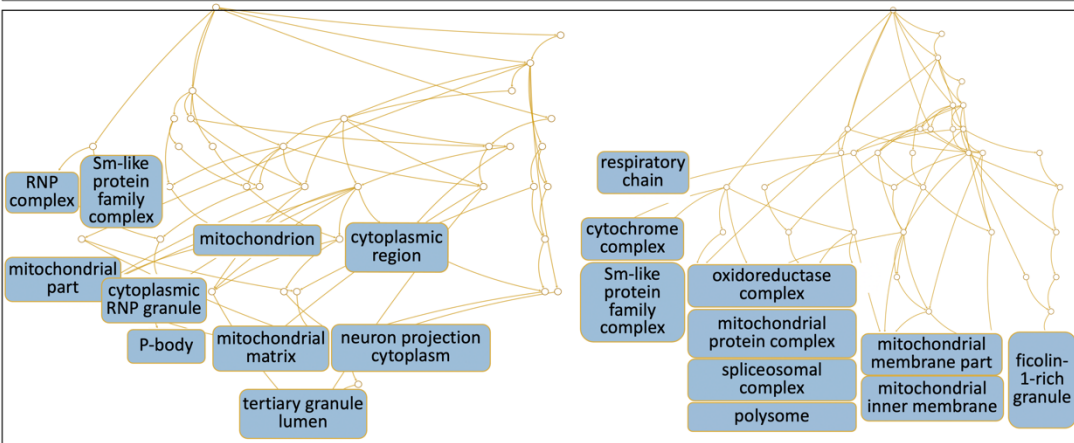

## D KEGG pathways

|                                            |                            |
|--------------------------------------------|----------------------------|
| <b>Pathway description</b>                 | <b>Pathway description</b> |
| RNA degradation                            | Alzheimer disease          |
| Metabolic pathways                         | Oxidative phosphorylation  |
| Fatty acid degradation                     | Thermogenesis              |
| Valine, leucine and isoleucine degradation | Parkinson disease          |
| Glycolysis / Gluconeogenesis               | Cardiac muscle contraction |
| Necroptosis                                | Citrate cycle (TCA cycle)  |
| Propanoate metabolism                      | Huntington disease         |
| Glycine, serine and threonine metabolism   | Metabolic pathways         |
| Tryptophan metabolism                      | Spliceosome                |
| Ferroptosis                                | NAFLD                      |

281 **Fig 3. Gene ontology overrepresentation-based enrichment analyses for differentially abundant**  
282 **proteins. Panel A.** Biological processes significantly enriched in good quality eggs (Left) versus in  
283 poor quality eggs (Right). **Panel B.** Molecular functions significantly enriched in good quality eggs  
284 (Left) versus in poor quality eggs (Right). **Panel C.** Cellular components significantly enriched in good  
285 quality eggs (Left) versus in poor quality eggs (Right). **Panel D.** KEGG pathways significantly enriched  
286 in good quality eggs (Left) versus in poor quality eggs (Right). A total of N = 51 and N=64 proteins  
287 which were up- and down-regulated in poor quality eggs were mapped against human database for  
288 enrichment analyses using the overrepresentation method at  $p < 0.05$  followed by Benjamini Hochberg  
289 correction for multiple testing ( $p < 0.05$ ).

290

291

292 In contrast, biological processes which were overrepresented by proteins up-regulated in poor  
293 quality eggs were as follows; generation of precursor metabolites and energy, mitochondrial transport,  
294 mitochondrial respiratory chain complex assembly, tricarboxylic acid metabolic process, nucleoside  
295 phosphates metabolic/biosynthetic process, ribonucleotide metabolic process, RNA splicing, and  
296 mRNA processing. Molecular functions which were mostly overrepresented by poor quality down-  
297 regulated proteins were related to cofactor binding, metal cluster binding, pattern binding, modification-  
298 dependent protein binding, kinesin binding, TBP-class protein binding, electron transfer activity, pre-  
299 mRNA binding, single-stranded RNA binding, and mRNA binding. Cellular components  
300 overrepresented by these proteins were respiratory chain, cytochrome complex, Sm-like protein family  
301 complex, oxidoreductase complex, mitochondrial protein complex, spliceosomal complex, polysome,  
302 mitochondrial membrane part, mitochondrial inner membrane and ficolin-1-rich granule. KEGG  
303 pathways which were significantly overrepresented by the same set of proteins were Alzheimer disease,  
304 oxidative phosphorylation, thermogenesis, Parkinson's disease, cardiac muscle contraction, citrate  
305 cycle (TCA cycle), Huntington disease, metabolic pathways, spliceosome, and non-alcoholic fatty liver  
306 disease (NAFLD) (**Fig 3A, 3B, 3C and 3D Right panels**).

307 When the 115 differentially regulated proteins with significant differences in abundance  
308 between good and poor quality eggs were submitted separately (down-regulated in BQ; N = 64, up-  
309 regulated in BQ; N = 51) to a functional protein association networks analysis using the Search Tool  
310 for the Retrieval of Interacting Genes/Proteins (STRING) and the human protein database, they resolved

311 into networks with significantly and substantially greater numbers of known and predicted interactions  
 312 between proteins than would be expected of the same size lists of proteins randomly chosen from the  
 313 human database (**Fig 4**). The subnetwork formed by proteins down-regulated in poor quality eggs is  
 314 made up of three major interrelated clusters mainly related to cytoskeletal regulation, energy and protein  
 315 homeostasis (**Fig 4 Left panel**). A subcluster to the far left includes proteins involved in cytoskeletal  
 316 organization such as Adenylyl cyclase-associated protein 1 (CAP1), Actin beta (ACTB), Tubulin alpha  
 317 4a (TUBA4A), Kinesin family member 1B (KIF1B), Voltage dependent anion channel 1 (VDAC1),  
 318 Deoxyuridine 5'-triphosphate nucleotidohydrolase, mitochondrial (DUT), Adenosylhomocysteinase  
 319 like 1 (AHCYL1) and in energy production and homeostasis such as Creatine kinase (M-type) (CKM),  
 320 Phosphoglycerate mutase 1 (PGAM1), Enolase (ENO1). Other proteins forming this cluster are the  
 321 Complement component 1 Q subcomponent-binding protein, mitochondrial (C1QBP), and Prohibitin  
 322 (PHB) which are related to mitochondrial structure and the Superoxide dismutase 1 (SOD1) which is  
 323 related to redox/detox activities.

324  
 325

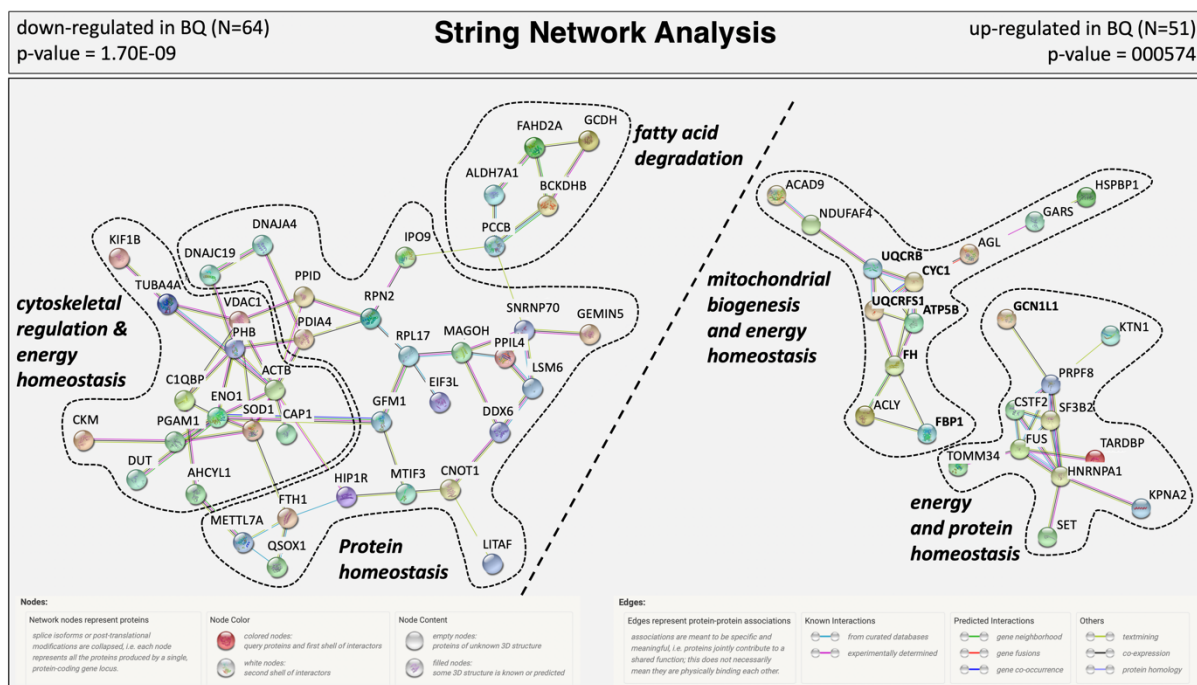

326 **Fig 4. STRING Network Analysis of the differentially abundant proteins.** Protein-protein  
 327 interactions network clusters are given for N = 64 proteins which were down-regulated in poor quality  
 328 (BQ) eggs and N = 51 proteins which were up-regulated in BQ eggs. The subnetworks formed by  
 329 proteins down-regulated in BQ eggs are shown to the upper left above the diagonal dashed line, and the

330 subnetworks formed by proteins up-regulated in BQ eggs are shown to the lower right below the  
331 diagonal dashed line. Where possible, dashed lines encircle clusters of interacting proteins involved in  
332 physiological processes distinct from other such clusters. Each network node (sphere) represents all  
333 proteins produced by a single, protein-coding gene locus (splice isoforms or post-translational  
334 modifications collapsed). Only nodes representing query proteins are shown. Nodes are named for the  
335 human proteins to which spectra were mapped; for full protein names, see **Tables S2**. Edges (colored  
336 lines) represent protein-protein associations meant to be specific and meaningful, e.g. proteins jointly  
337 contribute to a shared function but do not necessarily physically interact. Model statistics are presented  
338 at the top left and at the top right of each panel for proteins down- and up-regulated in BQ eggs,  
339 respectively. Explanation of edge colors is given below panels.

340

341

342         The cluster to the right of the revealed network covers proteins related to mRNA biogenesis  
343 and transcription (i.e. LSM6 homolog, U6 small nuclear RNA and mRNA degradation  
344 associated (LSM6), ATP-dependent RNA helicase DDX6 (DDX6), Small nuclear ribonucleoprotein  
345 U1 subunit 70 (SNRNP70), Mago homolog, exon junction complex subunit (MAGOH)), protein  
346 translation (i.e. Gem-associated protein 5 (GEMIN5), Eukaryotic translation initiation factor 3 subunit  
347 L (EIF3L), Ribosomal protein L17 (RPL17), G elongation factor mitochondrial 1 (GFM1), and the  
348 Translation initiation factor IF-3, mitochondrial (MTIF3)), protein folding (i.e. Dolichyl-  
349 diphosphooligosaccharide-protein glycosyltransferase subunit 2 (RPN2), Methyltransferase like 7A  
350 (METTL7A), Peptidylprolyl isomerase like 4 (PPIL4), DnaJ heat shock protein family (Hsp40) member  
351 A4 (DNAJA4), DnaJ heat shock protein family (Hsp40) member C19 (DNAJC19), Peptidylprolyl  
352 isomerase D (PPID), Protein disulfide isomerase family A member 4 (PDIA4), Quiescin sulfhydryl  
353 oxidase 1 (QSOX1), and protein transport (i.e. Importin (IPO9) and the Huntingtin-interacting protein  
354 1-related protein (HIP1R)). Three other proteins covered by this subcluster are CCR4-NOT  
355 transcription complex subunit 1 (CNOT1) a transcription suppressor in DNA damage,  
356 Lipopolysaccharide-induced tumor necrosis factor-alpha factor homolog (LITAF) which targets  
357 proteins for lysosomal degradation, and Ferritin heavy chain 1 (FTH1) which is related to cellular iron  
358 homeostasis. The cluster to the upper right side of the major network covers proteins with major  
359 functions mostly related to fatty acid degradation (i.e. Propionyl-CoA carboxylase beta chain,

360 mitochondrial (PCCB), Alpha-aminoadipic semialdehyde dehydrogenase (ALDH7A1), Glutaryl-CoA  
361 dehydrogenase, mitochondrial (GCDH)) and amino acid catabolism in mitochondria (i.e. 2-  
362 oxoisovalerate dehydrogenase subunit beta, mitochondrial (BCKDHB)) and a redox factor which is  
363 used during respiration in electron transport chain (Fumarylacetoacetate hydrolase domain containing  
364 2A (FAHD2A)).

365 Proteins which are found to be up-regulated in poor quality eggs formed a network made of  
366 two major subclusters in total (**Fig 4 Right panel**). The first subcluster to the top left covers proteins  
367 which are mainly involved in mitochondrial structural proteins (i.e. Ubiquinol-cytochrome c reductase  
368 binding protein (UQCRB), Cytochrome b-c1 complex subunit Rieske, mitochondrial (UQCRFS1),  
369 Cytochrome c1 (CYC1), and ATP synthase F1 subunit beta (ATPF5B)), complex assembly factors (i.e.  
370 Complex I assembly factor ACAD9, mitochondrial (ACAD9), NADH:ubiquinone oxidoreductase  
371 complex assembly factor 4 (NDUFAF4)), mitochondrial energy generation related proteins (i.e.  
372 Fumarate hydratase, mitochondrial (FH), ATP citrate lyase (ACLY), Fructose-bisphosphatase 1  
373 (FBP1), and Glycogen debranching enzyme (AGL)). This cluster is interconnected with two other  
374 proteins with the Glycine-tRNA ligase (GARS) which is related to protein translation and the Hsp70-  
375 binding protein 1 (HSPBP1) which is related to protein degradation and synthesis inhibition. The second  
376 major subcluster to the bottom right covers proteins mainly related to mRNA biogenesis and  
377 transcription (i.e. Cleavage stimulation factor subunit 2 (CSTF2), Splicing factor 3b subunit 2 (SF3B2),  
378 RNA-binding protein FUS (FUS), Pre-mRNA processing factor 8 (PRPF8), Heterogeneous nuclear  
379 ribonucleoprotein A1 (HNRNPA1) and TAR DNA binding protein (TARDBP)). Some other proteins  
380 within this cluster are the Mitochondrial import receptor subunit TOM34 (TOMM34) and Kinectin 1  
381 (KTN1) which are involved in mitochondrial biogenesis, the Karyopherin subunit alpha 2 (KPNA2) a  
382 nuclear protein import protein, GCN1 activator of EIF2AK4 (GCN1) related to protein degradation and  
383 synthesis inhibition and the SET nuclear proto-oncogene (SET) involved in DNA replication and  
384 chromatin binding.

385 Enrichment results for the revealed networks are given in **Table S3**. Aside from being in  
386 complete accordance with GO enrichment analyses for biological processes, molecular functions and  
387 cellular components results have shown interesting KEGG and Reactome pathway enrichment

388 signatures. Proteins down-regulated in poor quality eggs, on one hand, were enriched in metabolic  
389 pathways, RNA degradation, valine, leucine, and isoleucine degradation, fatty acid degradation,  
390 necroptosis and glycolysis/gluconeogenesis KEGG pathways and the metabolism Reactome pathway  
391 (PPI network enrichment value  $p = 1.70 \times 10^{-9}$ ). Proteins up-regulated in poor quality eggs, on the other  
392 hand, were enriched in Alzheimer's disease, Parkinson's disease, thermogenesis, metabolic pathways,  
393 oxidative phosphorylation, cardiac muscle contraction, Huntington's disease, citrate cycle (TCA cycle),  
394 spliceosome and non-alcoholic fatty liver disease (NAFLD) KEGG pathways, and the citric acid (TCA)  
395 cycle and respiratory electron transport, respiratory electron transport, ATP synthesis by chemiosmotic  
396 coupling, and heat production by uncoupling proteins, respiratory electron transport, processing of  
397 capped intron containing pre-mRNA, mRNA splicing - major pathway, metabolism, ISG 15 antiviral  
398 mechanism, and metabolism of RNA Reactome pathways (PPI network enrichment value  $p =$   
399 0.000574).

400 Taking into account the overall results obtained from the TMT labeling based LC-MS/MS  
401 quantification, a total of 21 proteins with significant differential abundance between good and poor  
402 quality eggs were chosen as candidate markers of egg quality in this study. The thirteen proteins down-  
403 regulated in poor quality eggs were chosen to represent the majority of functional categories with a  
404 special emphasis to mitochondrial biogenesis and energy metabolism related proteins. And those up-  
405 regulated in poor quality eggs were chosen to mostly represent the mitochondrial biogenesis and energy  
406 metabolism functional categories. Fold difference in abundance of candidate proteins between good and  
407 poor quality eggs varied between 1.07 and 1.85 for poor quality down-regulated proteins and between  
408 1.07 and 4.67 for poor quality up-regulated proteins. Comparisons in abundance of these proteins  
409 between good and poor quality halibut eggs are given in **Fig S2**.

#### 410 **qPCR**

411 Gene expression levels for the 21 candidate marker proteins with significant difference in  
412 protein abundance between good and poor quality eggs are given in **Fig S3**. Four out of these 21 genes  
413 (*mt-nd5*, *mt-atp6*, *acly1*, and *dhrs9*) exhibited an increase in gene expression with the same tendency to  
414 protein abundance, but these differences were not significantly different. Nine of out these 21 genes  
415 (*gcdh*, *ppid*, *gatd3a*, *gfm1*, *cap1*, *phb*, *sod1*, *mecr*, and *vdac*) exhibited a converse tendency to protein



416 abundance and these differences were also not significant. Nevertheless, 8 out of 21 genes (*cycl*, *fh*,  
417 *uqcrb*, *gcn1*, *ghitm*, *uqcrfs1*, *fbp1a*, and *atp5fla*) exhibit a gene expression pattern with similar  
418 increasing tendency to protein abundance and significant differences between good and poor quality  
419 eggs (Independent samples t-test,  $p < 0.05$  followed by Benjamini Hochberg correction for multiple  
420 testing,  $p < 0.05$ ).

421

#### 422 **PRM based LC-MS/MS**

423 Differential abundance of 8 (MT-ND5, DHRS9, GATD3A, CAP1, GCN1, FBP1, UQCRFS1,  
424 GHITM) out of the 21 candidate marker proteins has been validated via parallel reaction monitoring  
425 based LC-MS/MS in this study (**Fig S4**). The number of proteins targeted by this method was limited  
426 to the availability of peptides that were suitable for use as reference for this study (See Material and  
427 Methods section for details). Results revealed all candidate marker proteins, except GHITM, to exhibit  
428 the same tendency of regulation as was detected by TMT-labeling based LC-MS/MS. However, only  
429 abundances of five candidate proteins (MT-ND5, DHRS9, GATD3A, FBP1, UQCRFS1) were  
430 significantly different between good and poor quality eggs. Results were consistently stable in all  
431 representative heavy peptides which varied from 1-3 in number of cases per candidate protein.  
432 Respectively, FBP1 and UQCRFS1 are up-regulated while MT-ND5, DHRS9 and GATD3A are down-  
433 regulated in poor quality eggs (**Fig S4**). Comparison of protein abundance quantification via TMT and  
434 PRM based LC-MS/MS applications and gene expression quantification via qPCR for the eight  
435 candidate marker proteins are given in **Fig 5**.

436

**A** Down-regulated in BQ eggs

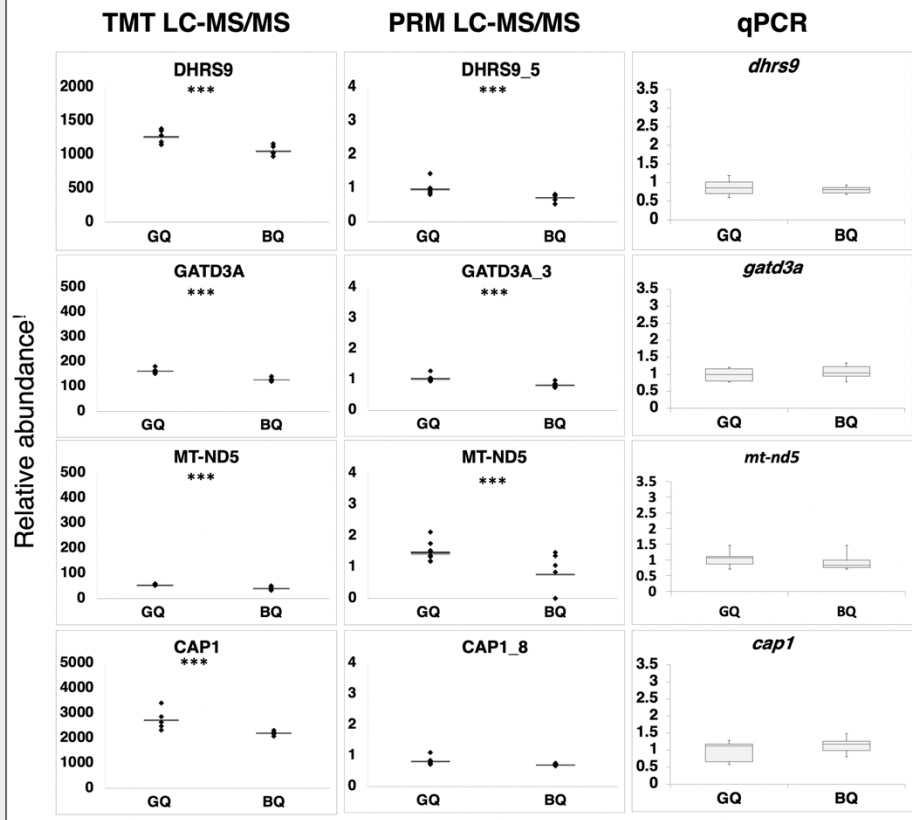

**B** Up-regulated in BQ eggs

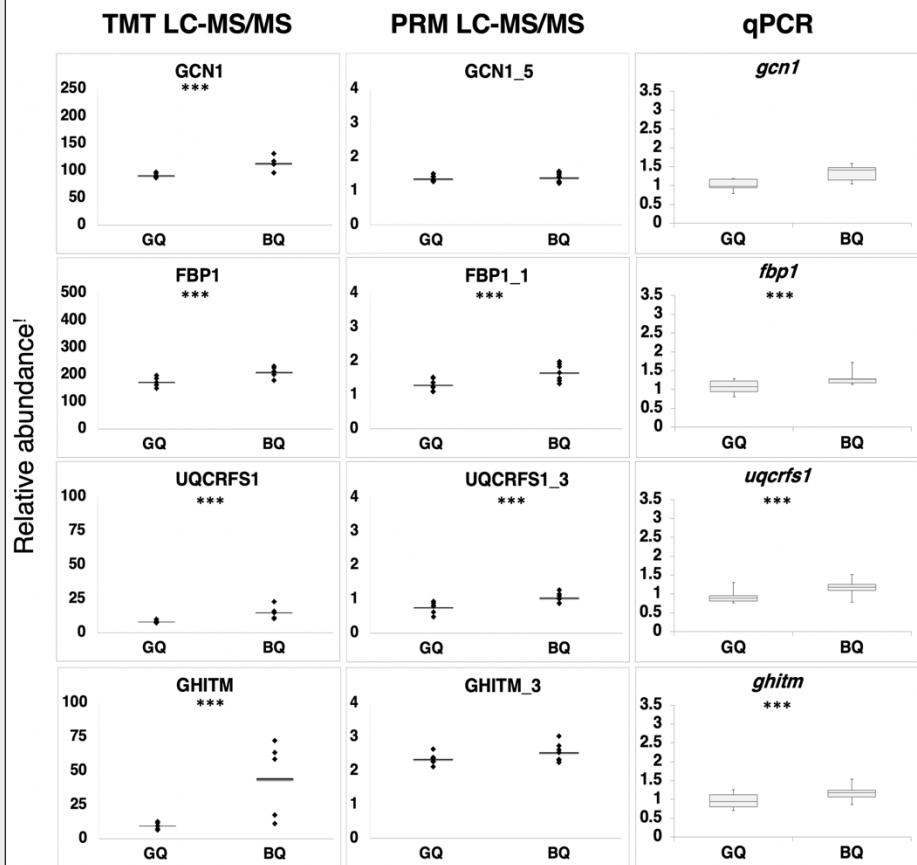

473 **Fig 5. Comparison of marker protein abundances and corresponding gene expressions. Panel A.**  
474 Proteins down-regulated in poor quality eggs **Panel B.** Proteins up-regulated in poor quality eggs.  
475 Asterisks indicate significant differences ( $p < 0.05$ ). Relative abundance<sup>1</sup> represents peak area intensities  
476 for protein abundances and gene copy numbers (normalized to transcript copy numbers of halibut *18S*)  
477 for gene transcript abundances. GQ: Good quality eggs BQ: poor quality eggs.

478

479

#### 480 **Transmission electron microscopic observations and mtDNA levels**

481 In the guidance of the molecular signatures discovered in this study to be potentially impaired  
482 in poor quality eggs, an additional transmission electron microscopy study was conducted with the  
483 intention to detect certain morphological differences in mitochondria between good and poor quality  
484 eggs. Results, shown in **Fig S5**, revealed the number of vesicles with double membranes which highly  
485 resembles intact mitochondria, and the number of intact mitochondria (those with  $\geq 5$  cristae) to be  
486 significantly higher in poor quality eggs ( $p = 0.000724$  and  $p = 0.010729$ , respectively). Accordingly,  
487 poor quality eggs seemed to contain about  $\sim 1.3$  x higher number of vesicles and  $\sim 1.2$  x higher number  
488 of intact mitochondria. Poor quality eggs additionally contained significantly higher (1.3 x) cristae  
489 number on average in comparison to good quality eggs ( $p = 9.21E-15$ ). Good quality eggs on the other  
490 hand, contained larger and well-formed mitochondria with significantly higher mitochondrial area  
491 ( $\mu\text{m}^2$ ) and mitochondria circularity ( $p = 1.15E-08$  and  $p = 0.016094$ , respectively). There was no  
492 significant difference in total mitochondrial area per cytoplasmic area between good and poor quality  
493 eggs ( $p = 0.408$ ). A high variation among females of the same quality group and within eggs from the  
494 same batch have been observed. Some eggs from good quality egg batches were observed to contain  
495 irregularly shaped empty vesicles (apparently used to be mitochondria) while some others from poor  
496 quality egg batches were observed to contain well-formed mitochondria with well-defined cristae.  
497 Moreover, some patterns of mitochondrial movements indicating potential to fusion activity were also  
498 observed in both good and poor quality eggs. Some examples for these observations are given in **Fig 6**  
499 **and Fig S6.**

500

501

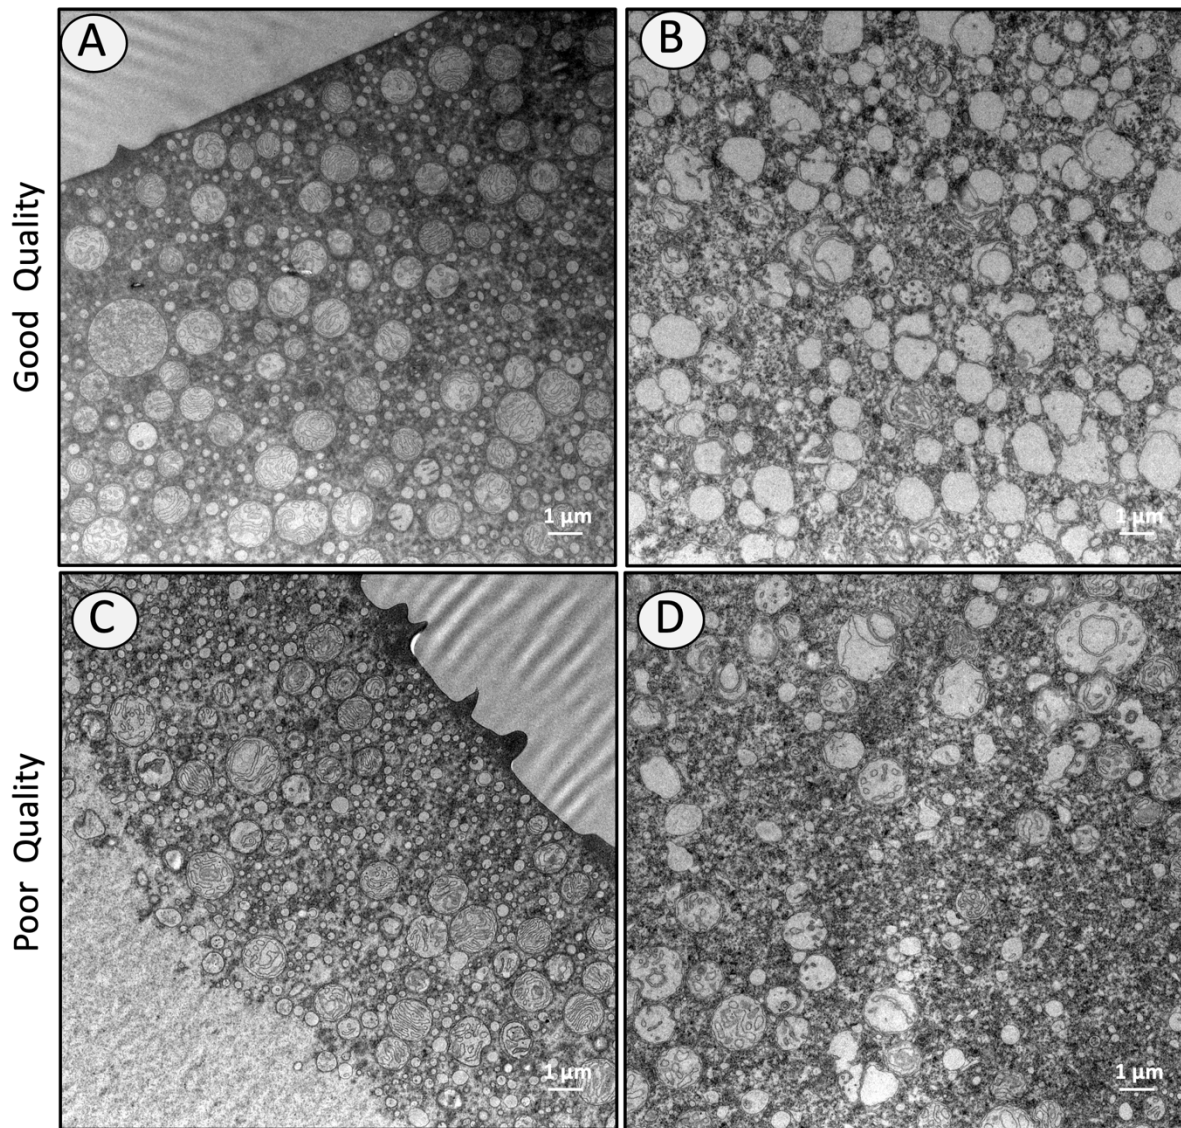

502 **Fig 6. TEM images representing variability of observations between eggs from good and poor**  
 503 **quality batches.** Despite the standard treatment of biological samples, a high variability has been  
 504 observed between eggs within the same batch. **Panel A** represents an egg containing a high number of  
 505 well-formed mitochondria while **Panel B** represents and egg containing a high number of completely  
 506 deformed mitochondria. Both eggs belonging to the same good quality batch and were kept within the  
 507 same tube during fixation and postfixation treatments. **Panels C and D** on the contrary represents an  
 508 egg containing a number of better-shaped mitochondria while **Panel B** represents and egg containing a  
 509 deformed mitochondria. Both eggs belonging to the same poor quality batch and were similarly kept  
 510 within the same tube during fixation and postfixation treatments. Scalebars indicate 1  $\mu\text{m}$  at 8K  
 511 magnification.

512  
 513

514           Significantly higher numbers of smaller and poorly formed mitochondria containing higher  
 515 number of cristae in poor quality halibut eggs led us to quantify the genomic mitochondrial DNA levels

516 (*mt-nd5* and *mt-atp6*) in good versus poor quality eggs. Results did not reveal any statistically different  
517 mtDNA levels in poor quality eggs in comparison to good quality eggs at both 1 hpf and 24 hpf stages  
518 ( $p > 0.05$ ) (Fig 7).

519

520

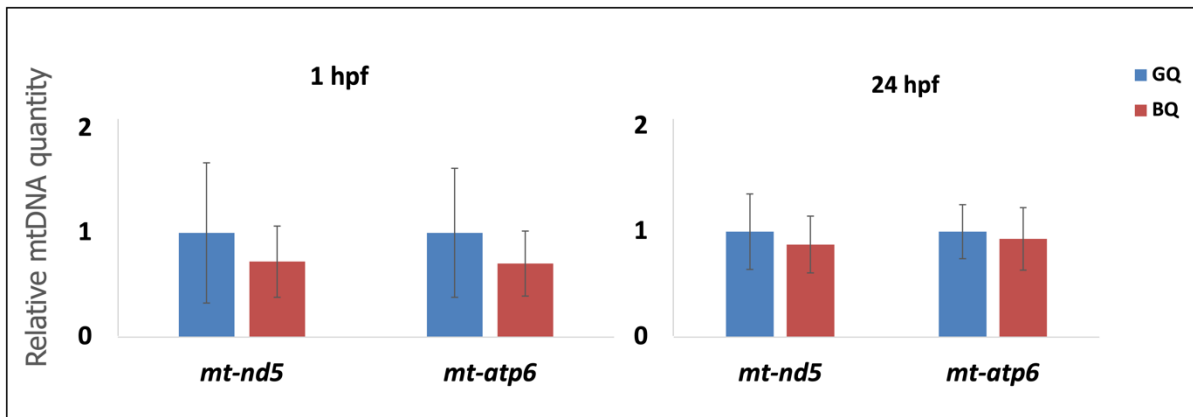

521 **Fig 7. Mitochondrial DNA Quantification.** Genomic DNA abundance for *mtnd5* and *mt-atp6* was  
522 measured via TaqMan qPCR using standard curve method in 1 hpf and DDCT method with 18S  
523 ribosomal RNA as reference gene in 24 hpf halibut eggs. Results indicate no statistically different  
524 abundances of mtDNA in poor quality eggs in comparison to good quality eggs ( $p > 0.05$ ) at both stages.  
525 GQ: Good quality eggs BQ: poor quality eggs.

526

527

## 528 DISCUSSION

### 529 Overview of the biological status of Atlantic halibut eggs

530 The present study was undertaken to gain insight into the molecular mechanisms involved in  
531 egg quality determination in Atlantic halibut. The 1-cell-stage embryo was chosen as the biological  
532 material for this study to allow potential comparisons with results obtained from zebrafish in previous  
533 studies (22,24) (Yilmaz et al., 2017, Yilmaz et al., 2021). Females of various backgrounds (origin, age,  
534 size, experience in reproductive activity) were used as source of biological samples to ensure coverage  
535 for multiple factors involved in egg quality determination. An egg quality assessment protocol was  
536 established based on embryo survival prior to hatching after correlation assessment among all  
537 considered parameters (female fecundity, egg buoyancy, fertilization rate, normal cell division, survival

538 prior hatching) based on experience in hatchery practices. In contrast to other marine species, halibut  
539 has shown no clear relation of egg buoyancy to embryo survival. Biological samples which were  
540 collected during consecutive reproductive seasons (2019-2021), with slight changes in the set of  
541 females, allowed validation of our quality assessment protocol as well as our findings at proteomic and  
542 transcriptomic level. The narrow window in survival rate differences between good and poor quality  
543 egg batches (14, 5, and 15 %, for 2019, 2020, and 2021, respectively) empowers the significance of our  
544 findings. Furthermore, using human database for protein identification, enrichment analyses and protein  
545 network analyses fortified the significance of our findings. The overall findings of this study suggest  
546 potential disruptions in protein and energy homeostasis mechanisms in poor quality eggs.

547

#### 548 **Protein homeostasis**

549 Cellular functions during embryogenesis rely on proteostasis, defined mainly by the appropriate  
550 regulation of protein synthesis, protein folding, and protein degradation (25) [[Buszczak et al., 2014](#)]. The  
551 precise level of protein synthesis that might be ongoing in early stages of embryonic development in  
552 fishes is unknown. However, correct protein translation and folding is a crucial step in protein synthesis  
553 since accumulation of misfolded and/or unfolded proteins in the ER lumen disturbs its functioning,  
554 leading to ER stress which might have severe consequences in developmental competence.

555 Overall observations from this study suggest somehow blocked or improper translation and  
556 protein folding activities in poor quality halibut eggs. Accordingly, the global proteomic profiling  
557 results indicate impaired proteostasis in poor quality halibut eggs. Higher frequency distribution of  
558 proteins related to protein translation and folding in good quality eggs but of proteins related to  
559 transcription and protein degradation and synthesis inhibition in poor quality eggs empowers the signals  
560 for this impairment. Additional results with overrepresentation of proteins related to protein folding,  
561 RNP complex biogenesis, and RNA catabolic processes in good quality eggs in contrast to  
562 overrepresentation of proteins related to RNA splicing and mRNA processing indicate the presence of  
563 ER stress conditions and activated UPR mechanisms in poor quality eggs. The absence of a closely  
564 interlinked protein homeostasis network in comparison to good quality eggs and down-regulation of  
565 proteins related to protein synthesis (PDIA4, PPID, GFM) in poor quality eggs strengthen this

566 hypothesis. These findings strikingly resemble the ones reported for poor quality zebrafish eggs (22)  
567 (Yilmaz et al., 2017) and for eggs from females lacking type I and type III vitellogenin genes in their  
568 genomes (24) (Yilmaz et al., 2021). Even though a strong connection between the proper function of  
569 the multiple Vtg system and egg quality has never been established (26,27) (Pousis et al., 2018, Yilmaz  
570 et al., 2018), these common signatures between two evolutionary distinct species express the need for  
571 investigations targeting the link in a higher number of fish species in future studies.

572         Despite the need for more detailed studies on ER stress signaling and UPR, our current findings  
573 set a hallmark step taken towards understanding potential impairments of these mechanisms in poor  
574 quality fish eggs. Diversely, heat, osmotic and pH stress, maternal nutrition and physiology, ovarian  
575 oxidative stress, oxygen and glucose availability and limitations in fatty acid availability are listed  
576 among the main factors inducing ER stress and activation of UPR and ER stress signaling in oocytes  
577 and embryos of several mammals, including mice, pigs, bovine, rabbit, and human (28) (Latham 2015).  
578 The multifariousness in the background of females included in this study fortifies the homogeneity of  
579 our findings but it makes it difficult to infer the main causes of the identified impairments. Further  
580 research is clearly needed to determine and ascertain the potential causes of these observations.

581

## 582 **Energy homeostasis and mitochondrial biogenesis**

583         Biological activities supporting cell divisions in newly fertilized embryos of egg laying animals  
584 are mainly dependent on maternal transcripts, proteins, lipids, and other key molecules loaded into the  
585 oocyte prior to final maturation and ovulation. The high amount of energy required to conduct these  
586 activities is mainly provided by a normal functioning mitochondria pool, which is produced during  
587 oogenesis and peaks during later stages of folliculogenesis (29,30) (St John 2014, Babayev and Seli,  
588 2015). Before embryonic mitochondria take over, the embryo is dependent on the functioning of the  
589 existing maternal mitochondria supply to provide the required energy for viability (31,32) [Artuso et  
590 al., 2012, Chappel et al., 2013]. Deficiencies in mitochondrial structure and function have been shown  
591 to impact egg quality and developmental competence in a vast array of species including human (30,33)  
592 [Babayev and Seli, 2015, Ge et al., 2012].

593 Overrepresentation of mitochondrial biogenesis proteins in poor quality eggs in addition to the  
594 specific network mainly formed by proteins related to mitochondrial biogenesis, organization and  
595 energy homeostasis were considered as indicators of deteriorations in mitochondrial activities in poor  
596 quality eggs in this study. Additional results indicating differential abundance of several mitochondria  
597 biogenesis and energy homeostasis related proteins between good and poor quality halibut eggs (MT-  
598 ND5, GATD3A, PHB, ACLY, CYC1, FH, UQCRB, GHITM, UQCRFS1, FBP1, and ATP5F1B) were  
599 contemplated as proofs to further scrutinize some of these marker candidates at both proteomic and  
600 transcriptomic levels. Interestingly enough, six of these candidate marker proteins (UQCRB, CYC1,  
601 UQCRFS1, ATP5F1B, FH, FBP1), were found to be haphazardly falling into the network formed by  
602 proteins down-regulated in poor quality eggs. Gene expression levels for all these proteins, and more,  
603 were possible to quantify successfully while the availability of appropriate target peptides to be used in  
604 PRM based LC-MS/MS limited the number of proteins to be investigated at this level. Nevertheless,  
605 validation of these findings in sample sets collected at different reproductive seasons for five of these  
606 proteins (MT-ND5, GATD3A, GHITM, UQCRFS1, FBP1) has been accomplished successfully via  
607 both PRM based LC-MS/MS and qPCR methodologies.

608 As a result, abundance of several mitochondrial proteins and their corresponding gene  
609 expressions revealed significant differences between good and poor quality egg groups. Lower but non-  
610 significant protein and transcript abundances of MT-ND5 and MT-ATP6 in contrast to higher and  
611 highly significant protein and transcript abundances of CYC1, UQCRB, UQCRFS1 and ATP5F1B in  
612 poor quality eggs is intriguing. Nevertheless, all being key components of the inner membrane  
613 differential expression of these proteins and their corresponding genes are indicators of structural and  
614 functional impairments in mitochondria.

615 Highly significant overrepresentation of the amino acid degradation, fatty acid degradation, and  
616 glycolysis/gluconeogenesis KEGG pathways in good quality eggs, in contrast to overrepresentation of  
617 several human neurodegenerative disease pathways and mitochondrial functions related pathways in  
618 poor quality eggs may indicate a potential for the presence of more than one problem at the  
619 mitochondrial level: lack of substrates for mitochondria to generate energy in addition to structural  
620 deficiencies. Again, causes and factors leading to these potential problems are largely unknown and



621 need more detailed studies to be discovered. Prominent KEGG pathways revealed by network  
622 enrichment analyses such as Alzheimer's disease, Parkinson's disease, Huntington's disease, oxidative  
623 phosphorylation, and citrate cycle in addition to cardiac muscle contraction are highly consistent with  
624 the findings from *vtg* lacking zebrafish eggs (24) (Yilmaz et al., 2021). All these pathways seem to be  
625 interconnected (34–38) [Chen et al., 2010, Youle et al., 2012, Rugarli and Langer, 2012, Labbadia et  
626 al., 2013, Tublin et al., 2019] and previously reported to be linked to perturbations in mitochondrial  
627 maintenance, localization, and activity along with aberrant protein folding (37,39) [Williams and  
628 Paulson, 2008, Labbadia et al., 2013], all of whom signatures were observed in our study, leading to  
629 subsequent impairments in normal development (38) [Tublin et al., 2019]. The cardiac muscle  
630 contraction pathway was previously linked to a cardiac and yolk sac edema phenotype observed in  
631 zebrafish eggs lacking certain *vtgs* in their genomes (23,24) (Yilmaz et al., 2019, 2021). Further research  
632 targeting morphological observations on development of offspring originating from different quality  
633 halibut egg batches are needed.

634         Significant enrichment and differential abundance of proteins related to mitochondrial  
635 biogenesis in poor quality eggs led us to investigate certain mitochondrial parameters at transmission  
636 electron microscopic level. The two parameters which were considered to represent the abundance of  
637 mitochondria were 1) the number of vesicles which resemble mitochondria (vesicles containing double  
638 membranes), and 2) the number of intact mitochondria (vesicles containing  $\geq 5$  solid cristae) per  
639 cytoplasmic area. Both parameters were found to be consistently and significantly higher in poor quality  
640 eggs. In addition, the number of cristae per mitochondria was also significantly higher in poor quality  
641 eggs. These results seem to be puzzling and controversial to the generally accepted concept stating low  
642 numbers of mitochondria and mtDNA copies as indicators of low oocyte quality and embryonic  
643 developmental competence in several organisms (13,32,40–42) [Chappel 2013, Diez-Juan et al., 2015,  
644 Fragouli et al., 2015; reviewed in Kim and Seli, 2019, Ma et al., 2019]. However, they are in fact in  
645 accordance with findings from other studies contradicting the utility of mtDNA copy number as marker  
646 for embryonic competence in humans (42–46) (Treff et al., 2017, Victor et al., 2017, Klimczak et al.,  
647 2018; reviewed in Kim and Seli, 2019, Scott et al., 2020). To test the potential relation between mtDNA  
648 levels and mitochondrial abundance we quantified genomic DNA levels of two key mitochondrial genes

649 (*mt-nd5* and *mt-atp6*) in a separate experiment. Results revealed no statistically significant differences  
650 in mtDNA abundances between good and poor quality eggs at both 1 hpf and 24 hpf stages. These  
651 findings were in accordance with those from a previous study on transcriptome analysis of egg viability  
652 in rainbow trout, *Oncorhynchus mykiss* (13) (Ma et al., 2019). In apparent contrast with the non-  
653 significant differences in DNA and transcript abundances of *mt-nd5* and *mt-atp6* the significantly higher  
654 transcript and protein abundance of some other mitochondrial proteins is intriguing. Significantly higher  
655 transcription activities resulting in high numbers of malformed mitochondria despite the similar mtDNA  
656 abundance in poor quality eggs might indicate impairments at gene expression and protein synthesis  
657 levels. An increasing number of mitochondria has been proposed to be linked to compensatory response  
658 of the cell to mitochondrial mutations leading to impaired function and reduction in energy synthesis  
659 (47) (Monnot et al. 2013). Smaller and more irregularly shaped mitochondria in poor quality eggs  
660 provide supportive evidence of the potential of mitochondrial structural deformities which might be  
661 related to ER stress and protein folding deficiencies. The overall findings of the TEM are consistent  
662 and complementary to proteomic and transcriptomic findings in this study however, high variability  
663 between females of the same quality group and within eggs from the same female necessitate extension  
664 of this study with higher number of replicates in the future.

665

666

## 667 CONCLUSIONS

668 This study provides concrete results on signatures of impairments in protein and energy  
669 homeostasis related mechanisms in newly fertilized poor quality Atlantic halibut eggs. Such critical  
670 impairments and subsequent cellular dysfunctions are marked with solid results from global proteomic  
671 profiling, targeted proteomics, transcript and mtDNA abundance measurements and further TEM  
672 observations in biological samples of various background collected during three sequential reproductive  
673 seasons. The highly variable background of females used as source to different quality egg batches in  
674 this study strengthens the legitimacy of the observed molecular signatures. Moreover, high consistency  
675 between findings from this and previous zebrafish research might indicate a common stereotypical  
676 sequence of interconnected events influencing developmental competence among fishes, human and

677 other mammals. Additional research may be required to validate the use of proteins identified in this  
678 study as egg quality markers in fishes and to expediate the details and the potential of these impairments  
679 occurring in different species. Nonetheless, this study will pave the way for future research and will  
680 help in acceleration of recent advances in the field of embryonic developmental competence of living  
681 organisms.

682

683

## 684 **MATERIAL and METHODS**

685 **Fig S9** and **Fig S10** summarize the process of sample collection and the implemented  
686 experimental design, respectively.

687

### 688 **Animal care and biological samples**

689 Egg samples from N = 10, 8, and 6 batches of Atlantic halibut were collected in 2019, 2020  
690 and 2021 reproductive seasons, respectively. Collected samples were from females with various  
691 background. The pool included aged and young females (~8 to  $\geq$  17 yrs), small and large females (weight  
692 of 25 - 70 kg, and length of 110 - 167 cm), females originated from the wild and F1 generation which  
693 were produced in captivity, females which were newly introduced to the system and those with  
694 experience in the system (3 and 12 yrs, respectively), and finally females which interchanged in the  
695 quality of eggs they release from year to year and those consistently spawning good or poor quality egg  
696 batches every year.

697 A total 22 mature female and male halibut were kept in 7 m diameter ~40000 lt capacity circular  
698 tanks with natural daylight conditions and sea water at salinity of 34 ppt, taken from 160 m depth. Water  
699 temperature ranged from 7.8 to 9 °C from May to December and then decreased to and kept at 6 °C until  
700 the end of the spawning season. Fish were hand-fed with an artificial broodstock diet (VITALIS Cal 22  
701 mm, Skretting, Norway) every other day to satiety, except during the spawning season when appetite  
702 was low (February-May).

703 Females were followed closely at the start of the spawning season to determine the first egg  
704 release time point and following that were checked every 36 - 42 h for the onset of the following batch

705 release based on morphological changes in the abdominal region. Eggs from spawns between the 3<sup>rd</sup>  
706 and the 5<sup>th</sup> batch were targeted in this study to ensure the fine tuning of spawning rhythm and stability  
707 of egg quality during the season in each female. Following the predicted ovulation of the targeted batch,  
708 which occurs at approximately 72 - 92 h after the release of the previous batch, eggs were stripped from  
709 mature females and fertilized with sperm collected immediately after. Replicates of 0.5 ml eggs per  
710 spawn were snap frozen in liquid nitrogen at 1-cell stage after fertilization and stored at -80 °C until  
711 analysis (**Fig S9**).

712         Hundred milliliters of fertilized eggs from each spawn were incubated in 250 l incubators and  
713 were kept in darkness, at 6 °C until hatching. Daily care involved removal of dead embryos from the  
714 bottom of incubators and measurement of their volume for mortality determination. Egg quality  
715 assessments were based on embryo survival prior to hatching at 12 dpf (days postfertilization). Egg  
716 batches with embryonic survival rates of  $\geq 76$  were considered to be of good quality and those spawns  
717 with  $\leq 62$  embryonic survival were considered to be of poor quality in 2019. This ratio was  $\geq 76$  % and  
718  $\geq 70$  % for good quality egg batches, and  $\leq 71$  and  $\leq 55$  for poor quality egg batches in the years 2020,  
719 and 2021, respectively. The list of egg batches collected during each year and egg quality assessment  
720 parameters and classifications are given in **Table S1**.

721

#### 722 **TMT labeling based LC-MS/MS**

723         Egg samples (0.5 ml) from a total of 10 spawns (N = 5 spawns for good quality, N = 5 spawns  
724 for poor quality) collected during the 2019 reproductive season were lysed in 1 ml modified RIPA lysis  
725 buffer (pH 7.4) containing; 50 mM Tris, 150 mM NaCl, 1 % NP-40, 1 % SDS, 1 % CHAPS, 0.5 %  
726 SDC, 1x protease inhibitor cocktail (cOmplete™ ULTRA Tablets, Roche). Sample lysis, protein  
727 concentration measurement and sample reduction processes were carried out as indicated by (48) [Berge](#)  
728 [et al. \(2019\)](#) with the following modifications: Samples were sonicated in 6 steps of 30 sec at 40 %  
729 amplitude with 30 sec stops between each followed by 30 min incubation on ice and centrifugation at  
730 16200 x g for 30 min at +4 °C. Protein extracts containing 30 µg of total egg proteins were mixed with  
731 lysis buffer in 40 µl total volume and reduced with 4 µl of 100 mM DTT for 1 h at RT (at 10 mM of  
732 final concentration). Samples were then alkylated with 6 µl of 200 mM Iodoacetamide (IAA) by

733 incubation in dark for 1h at RT. Alkylated samples were then enhanced using Single-Pot Solid-Phase-  
734 enhanced Sample Preparation (SP3) according to the protocol by (49) [Hughes et al. \(2019\)](#). Mix of two  
735 types of Sera-Mag SpeedBeads 50 mg/ml (GE Helathcare) was prepared at 75 µg/µl bead concentration  
736 in 47 µl of water. Four µl of beads mix at a bead/protein ratio of 10:1 (wt/wt) were added onto each  
737 alkylated sample along with 126 µl of 100 % EtOH (to 70 % final EtOH concentration). Following 7  
738 min incubation on a thermomixer at 1000 rpm 24 °C samples were washed 3 times in 80 % EtOH. A  
739 MagRack system was used to facilitate removal of liquid without disturbing the beads containing  
740 proteins of interest.

741         Tryptic digestion of proteins was carried out using porcine trypsin (Promega, GmbH,  
742 Mannheim, Germany). Trypsin solution prepared in 100 mM Ambic and 1 mM CaCl<sub>2</sub> at a 0.01 µg/µl  
743 concentration and 100 µl added onto each sample for a final concentration of ~1.2 µg trypsin per sample  
744 containing 30 µg of total protein (trypsin to sample ration 1:25). Samples containing trypsin were then  
745 sonicated twice for 30 sec and incubated for 16 h at 1000 rpm 37 °C. Peptides were then recovered by  
746 centrifugation at 13000 rpm for 3 min at RT. A second recovery was performed by washing beads with  
747 0.5 M NaCl via pipetting and 2 x ultrasound sonication for 30 sec and centrifugation at 13000 rpm for  
748 3 min at RT. Second recovery of peptide digests was combined with the previous one and peptide  
749 concentration was determined on Nanodrop to check for sufficient recovery. Peptide mixtures were  
750 desalted and concentrated on reverse-phase Oasis HLB µElution Plate (Waters Corporation,  
751 Manchester, UK) as indicated by (50) [Yadatie et al., 2014](#). Lyophilized peptides mixtures were  
752 reconstituted in 52 µl of 100 mM Triethyl ammonium bicarbonate (TEAB) buffer and peptide  
753 concentrations were determined on Nanodrop to check for sufficient recovery prior isobaric labeling  
754 using TMT10plex™ Isobaric Label Reagent Set, 1 x 0.8 mg (ThermoFisher Scientific). Twenty-one µl  
755 of each label (~0.4 mg) were added onto 50 µl of samples containing ~20 µg of peptide digests. After 1  
756 h incubation at RT, 4 µl of 5 % Hydroxylamine (NH<sub>2</sub>OH) were added and samples were incubated for  
757 an additional 15 min at RT to quench the reaction. All ten vials of samples were combined and  
758 approximately 100 µg peptide digests from this mix were fractionated using Pierce High pH Reversed-  
759 Phase Peptide Fractionation Kit (ThermoFisher Scientific) according to instructions from manufacturer.  
760 All fractions were lyophilized and reconstituted in a mix of 0.5 % Formic acid (FA) and 2 % ACN (at

761 ~0.5 µg/µl concentration) prior injection to the LC-MS/MS system, an Ultimate 3000 RSLC system  
762 (Thermo Scientific, Sunnyvale, California, USA) connected online to a Q-Excative HF mass  
763 spectrometer (Thermo Scientific, Bremen, Germany) equipped with EASY-spray nano-electrospray ion  
764 source (Thermo Scientific).

765 Peptides were separated during a biphasic ACN gradient from two nanoflow UPLC pumps  
766 (flow rate of 250 nl/min) on a 25 cm analytical column (PepMap RSLC, 25cm x 75 µm i.d. EASY-  
767 spray column, packed with 2 µm C18 beads). Solvent A and B were 0.1 % FA (vol/vol) in water and  
768 100 % ACN respectively. The gradient composition was 5 % B during trapping (5min) followed by 5-  
769 7 % B over 0.5 min, 7 - 22 % B for the next 59.5 min, 22 - 35 % B over 22 min, and 35 - 80 % B over  
770 5 min. Elution of very hydrophobic peptides and conditioning of the column were performed during 10  
771 min isocratic elution with 80 % B and 15 min isocratic conditioning with 5 % B, respectively. The  
772 eluting peptides from the LC-column were ionized in the electrospray and analyzed by the Q-Excative  
773 HF. The mass spectrometer was operated in the data-dependent-acquisition mode to automatically  
774 switch between full scan MS and MS/MS acquisition. Instrument control was through Q Excative HF  
775 Tune 2.9 and Xcalibur 4.1.

776 MS spectra were acquired in the scan range 375 - 1500 m/z with resolution  $R = 60\,000$  at m/z  
777 200, automatic gain control (AGC) target of  $3e6$  and a maximum injection time (IT) of 50 ms. The 12  
778 most intense eluting peptides above intensity threshold 50 000 counts, and charge states 2 to 6 were  
779 sequentially isolated to a target value (AGC) of  $1e5$  and a maximum IT of 110 ms in the C-trap, and  
780 isolation width maintained at 1.6 m/z (offset of 0.3 m/z), before fragmentation in the HCD (Higher-  
781 Energy Collision Dissociation) cell. Fragmentation was performed with a normalized collision energy  
782 (NCE) of 32 %, and fragments were detected in the Orbitrap at a resolution of 60 000 at m/z 200, with  
783 first mass fixed at m/z 110. One MS/MS spectrum of a precursor mass was allowed before dynamic  
784 exclusion for 30 sec with "exclude isotopes" on. Lock-mass internal calibration (m/z 445.12003) was  
785 used. The spray and ion-source parameters were as follows. Ion spray voltage of 1800 V, no sheath and  
786 auxiliary gas flow, and a capillary temperature of 275 °C conditions were additionally set for data  
787 acquisition.

788

## 789 **Data Search**

790           Obtained spectra searched against an in-house built proteome database originated from halibut  
791 egg transcriptome with additional peptide sequences for mitochondrial proteome and the vitellogenin  
792 proteins from this species. Data search was performed using the SequestHT search engine implemented  
793 in Proteome Discoverer 2.4 (Thermo Fisher Scientific). Trypsin was selected as protease with a  
794 maximum of two missed cleavage sites and cysteine carbamidomethylation and TMT10plex mass tags  
795 both at peptide N-terminus and Lysine side chain as fixed modifications. Methionine oxidation was  
796 selected as variable modification with a maximum of three such modifications per peptide. The  
797 precursor mass tolerance threshold was 10 ppm and the maximum fragment mass error 0.02 Da. A  
798 signal-to-noise filter of 1.5 was applied for precursor ions, and only charge states from two to five were  
799 used in the search. Filtering out the false positive peptide identifications were performed by means of  
800 False Discovery Rate (FDR) on the reversed database, estimated using the Percolator algorithm  
801 (<http://per-colator.com>). Peptide hits were filtered for an FDR of  $q < 0.01$ . In addition to the FDR filter,  
802 high confident threshold score filters for Sequest HT (cross correlation scores, XCorr) were as follows:  
803 1.9 ( $z = 2$ ), 2.3 ( $z = 3$ ), 2.6 ( $z = 4$  or higher). Only proteins/protein groups that were identified by two  
804 or more independent peptide hits were accepted as true positive identifications. Proteins that contained  
805 similar peptides and could not be differentiated based on MS/MS analysis alone were considered an  
806 equivalence class by using the protein grouping algorithm. Only master proteins from each group were  
807 considered for the following quantification analysis. Common laboratory contaminants (keratin and  
808 albumin proteins) were removed prior to following analysis. The mass spectrometry proteomics data  
809 have been deposited to the ProteomeXchange Consortium via the PRIDE (51) ([Perez-Riverol et al.,](#)  
810 [2019](#)) partner repository with the dataset identifier PXD029894 and a project DOI number of  
811 10.6019/PXD029894.

812

## 813 **Data Analysis**

814           Detected proteins were mapped against a common database for all organisms with available  
815 correspondent sequences and were identified based on their identities. Protein abundances were  
816 quantified based on peak area intensities. Accordingly, differentially abundant proteins were

817 determined based on  $p$  values resolved from independent samples t-test ( $p < 0.05$ ) followed by  
818 Benjamini Hochberg correction for multiple testing ( $p < 0.05$ ) using the SPSS software (IBM SPSS  
819 Statistics Version 19.0.0, Armonk, NY). Functional annotation of proteins found to be differentially  
820 abundant between good and poor quality eggs was performed using the UNIPROT and KEGG  
821 functional annotation tools. These proteins were then classified into thirteen arbitrarily chosen  
822 functional categories that would account for  $\geq 90$  % of the proteins as originally suggested by (22)  
823 [Yilmaz et al., 2017](#) with slight modifications. These functional categories are: transcription, translation,  
824 protein folding, protein transport, energy metabolism, mitochondrial biogenesis, cell cycle, division,  
825 growth and fate, lipid metabolism, metabolism of cofactors and vitamins, protein degradation and  
826 synthesis inhibition, oxidoreductase (redox)- and detoxification (detox)-related, and immune response-  
827 related. Differentially abundant proteins that could not be attributed to any of these categories and were  
828 placed in the category “Other”. For simplicity, proteins were attributed to only one category considered  
829 as the ‘best’ fit. Presented results are based on consensus annotations of two independent observers  
830 made before any other analyses categorizing the proteins (i.e. observations made ‘blind’). Chi square  
831 analysis with significance level of ( $p \leq 0.05$ ) was used to detect differences between groups in the  
832 distribution of differentially regulated proteins among functional categories.

833 Gene ontology overrepresentation analyses were conducted using the GESTALT (WEB-based  
834 GENE SeT AnaLysis Toolkit) (52) [[Liao et al., 2019](#)] available online at for Biological Process,  
835 Molecular Function, and Cellular Components, and KEGG Pathway terms using human proteins as  
836 reference database. Proteins which were differentially regulated between good and poor quality halibut  
837 eggs were additionally subjected to the analysis of protein-protein interaction networks (53) ([Szklarczyk](#)  
838 [et al., 2015](#)) separately using the STRING Network search tool available from the STRING Consortium  
839 online at [https://string-](https://string-db.org/cgi/input?sessionId=b1QVfHtqmBW4&input_page_active_form=multiple_identifiers)  
840 [db.org/cgi/input?sessionId=b1QVfHtqmBW4&input\\_page\\_active\\_form=multiple\\_identifiers](https://string-db.org/cgi/input?sessionId=b1QVfHtqmBW4&input_page_active_form=multiple_identifiers) with the  
841 data settings Confidence: Medium (0.40), Max Number of Interactions to Show: None/query proteins  
842 only. For the GESTALT and STRING analyses, only statistically significant enrichment results ( $p <$   
843  $0.05$ ) are reported.

844



## 845 **TaqMan based quantitative real time PCR**

846 Gene expression for a total of 21 proteins were tested in good versus poor quality halibut eggs  
847 using TaqMan based quantitative real-time PCR (qPCR). Total RNA extraction from frozen N = 19 egg  
848 batches, collected from 2019 and 2020 seasons, was performed using TRI Reagent™ (Thermo Fisher  
849 Scientific). cDNA was synthesized using SuperScript™ VILO™ cDNA Synthesis Kit (Thermo Fisher  
850 Scientific) from 1 µg of DNase treated (DNase I, Amplification Grade, Thermo Fisher Scientific) total  
851 RNA with 260/280 absorbance ratios of 1.9-2.1 (Nanodrop Spectrophotometer, Thermo Fisher  
852 Scientific) and RNA integrity values of 9-10 (Bioanalyzer, Agilent Technologies). Gene-specific  
853 primers and dual-labelled probes (labelled with 6-carboxyfluorescein and BHQ-1, Black Hole Quencher  
854 1 on 5' and 3' terminus, respectively) were designed using Eurofins Genomics qPCR assay design tool  
855 available online at <https://eurofinsgenomics.eu/en/ecom/tools/qpcr-assay-design/> and Integrated DNA  
856 Technologies (IDT) PrimerQuest Tool available online at  
857 <https://eu.idtdna.com/Primerquest/Home/Index>. Designed primers were additionally analyzed for  
858 secondary structures using IDT Oligo analyzer tool available online at  
859 <https://eu.idtdna.com/calc/analyzer> and produced by Eurofins Genomics. Sequences of these primers  
860 and probes used in this experiment are given in **Table S4**.

861 Each qPCR was performed in triplicates of 10 µl reactions containing cDNA (diluted at 1:100),  
862 400 nM of each primer, 200 nM of hydrolysis probe, and 1x TaqMan Fast Advanced Master Mix  
863 (Applied Biosystems, Thermo Fisher Scientific) according to the manufacturer's instructions in optical  
864 plates on a QuantStudio 5 Real-Time PCR system (ThermoFisher Scientific) equipped with 384-well  
865 block. No-template controls for each gene were included for each assay. PCR cycling conditions were  
866 as follows: 50°C for 2 mins, 95 °C for 20 s, 40 cycles at 95 °C for 1 s followed by an annealing-extension  
867 at 60° C for 20 s. The gene expression abundance within a sample set, relative to Atlantic halibut18S,  
868 was calculated using the  $2^{-\Delta\Delta Ct}$  mean relative quantification method in this study. Obtained data were  
869 subjected to independent samples t-test,  $p < 0.05$ ) followed by Benjamini Hochberg correction for  
870 multiple tests,  $p < 0.05$  (IBM SPSS Statistics Version 19.0.0, Armonk, NY).

871

## 872 **Parallel reaction monitoring based LC-MS/MS**

873 Eight out of a total 21 proteins (MT-ND5, CAP1, DHRS9, GCN1, GHITM, GATD3A, FBP1,  
874 UQCRFS1), which were previously determined as differentially abundant between good and poor  
875 quality egg batches using the TMT labeling based LC-MS/MS methodology, were carried out for  
876 further assessments as potential candidate biomarkers of egg quality in halibut. A parallel reaction  
877 monitoring based LC-MS/MS approach was followed in order to validate the differential abundance of  
878 these proteins between good and poor quality eggs originated from spawns collected both in 2019 (N =  
879 4 spawns for good quality, N = 4 spawns for poor quality) and in 2020 (N = 4 spawns for good quality,  
880 N = 4 spawns for poor quality). Egg samples were processed in the same manner as mentioned above  
881 for TMT labeling method until prior to isobaric labeling step. About 2-3 target peptides were selected  
882 for each protein based on the following criteria collected from (54–57) ([Lange et al., 2008](#), [Liebler and  
883 Zimmerman, 2013](#), [Hoofnagle et al., 2016](#) and [Chiva and Sabido, 2017](#)); uniqueness to the target  
884 protein, length of 5-26 aa, ~50 % hydrophobicity, no PTMs, no missed cleavages, positioned far  
885 downstream from N- or upstream from C-terminal, proper fragmentation (more than 3-4 fragment ions  
886 with well-defined peaks), peptide spectral matches (PSMs) (min 3), charges (min 2-3) and clear  
887 clustering in peptide abundance between good and poor quality eggs (**Fig S11**). Peptide PRM  
888 compatibility and hydrophobicity tests were performed using Peptide Synthesis and Proteotypic Peptide  
889 Analyzing Tool available online at ThermoFisher Scientific. List of target proteins and their  
890 corresponding target peptides are listed in **Table S5**. Target peptides for each of these proteins were  
891 purchased in stable isotope labelled synthetic peptides (SIS) form in crude quality from Thermo  
892 Scientific. The C-terminal lysine or arginine in the SIS peptides were replaced by isotope labelled lysine  
893 ( $^{13}\text{C}_6$ ,  $^{15}\text{N}_2$ ) or arginine ( $^{13}\text{C}_6$ ,  $^{15}\text{N}_4$ ), resulting in a mass difference of 8 Da and 10 Da, respectively, to  
894 the corresponding endogenous peptide. The SIS peptides were spiked in equal amounts into the digested  
895 protein samples, at approximately the same level as the endogenous peptide, prior to desalting with  
896 Oasis HLB  $\mu$ Elution Plate (Waters). The PRM data was analyzed using Skyline v1.4 (58) [[MacLean et  
897 al., 2010](#)] with the most abundant transition for quantification. Independent samples t-test was used to  
898 detect significant differences in abundance between good and poor quality eggs ( $p < 0.05$ ).

899

900

## 901 **Transmission Electron Microscopy**

902 Four to five eggs from each egg batch (N = 6 batches) that was collected during the 2021  
903 reproductive season were prefixed in Karnovsky's fixative (59) (Karnovsky 1965) containing 5 %  
904 glutaraldehyde, 2 % paraformaldehyde, and 0.1 M Sodium cacodylate buffer for 24 h to allow fixation  
905 of the chorion to facilitate its mechanical removal. Dechorionated egg samples were placed back into  
906 Karnovsky's fixative and transferred to the TEM facility for the consecutive steps of the sample  
907 preparation process. Eggs were postfixed in 1 % osmium tetroxide (EMS # 19134) diluted in 0.1 M  
908 sodium cacodylate buffer on ice for 1 hour. Samples were then washed in buffer and dehydrated using  
909 a graded ethanol series (30 %, 50 %, 70 %, 96 % and 100 %) before being transferred to a 1:1 solution  
910 of 100 % ethanol:propylene oxide in which they were incubated for 15 min. Samples were then  
911 incubated in 100 % propylene oxide for 15 min before gradually introducing agar 100 resin  
912 (AgarScientific R1031)0. Samples were then incubated in a drop of 100 % resin overnight and then  
913 placed in molds with fresh 100 % resin at 60°C for 48h to polymerize. Ultrathin sections of  
914 approximately 60 nm were collected from N = 5 different regions of each egg representing good or poor  
915 quality batches. Images of ultrathin sections at 8K magnification were used to assess the number of  
916 vesicles with double membranes (see **Fig S7** for examples) which highly resembles intact mitochondria  
917 and the number of intact mitochondria (those with  $\geq 5$  cristae) per cytoplasm area. Images at 20K  
918 magnification were used to assess the morphological differences such as the mitochondrial area ( $\mu\text{m}^2$ ),  
919 total mitochondrial area per cytoplasm area ( $\mu\text{m}^2$ ), mitochondria circularity and cristae number per  
920 mitochondria in a total of  $1200 \mu\text{m}^2$  area for each egg. Mitochondria circularity is calculated as;  
921  $4\pi(\text{Area})/(\text{Perimeter}^2)$ , where 1.0 indicates a perfect circle, while 0.0 indicates an elongated shape. A  
922 minimum of 50 counts per egg were collected for the cristae number assessment. Independent samples  
923 t-test was used to detect significant differences in mitochondrial counts between good and poor quality  
924 eggs ( $p < 0.05$ ) using SPSS (IBM SPSS Statistics Version 19.0.0, Armonk, NY).

925

## 926 **Mitochondrial gene quantification by real-time quantitative PCR**

927 Relative abundance of genomic DNA for *mtnd5* and *mt-atp6* was measured via TaqMan qPCR  
928 using standard curve method in 1 hpf and DDCT method in 24 hpf halibut eggs. Serial dilutions of a  
929 single good quality sample with known DNA concentration were used as a reference for the standard  
930 curve method and the 18S ribosomal RNA was used as a reference for relative quantification using  
931 DDCT method. For gDNA extraction from 1 hpf eggs the insoluble materials leftover following  
932 homogenization in TRI Reagent during RNA isolation was mixed with 300 $\mu$ l of 100% ethanol, tubes  
933 were inverted several times and incubated for 3 mins for genomic DNA isolation. The supernatant was  
934 removed after centrifugation at 2000 x g at +4 °C and pellets were resuspended in 1 ml of 0.1 M sodium  
935 citrate in 10% ethanol (pH 8.5). Samples were incubated for 30 mins at RT mixing occasionally by  
936 gentle inversion. The supernatant was discarded after centrifugation for 5 mins at 2000 x g at +4 °C,  
937 pellets were resuspended in 1.5 ml 75 % ethanol and incubated for 20 mins by occasionally mixing by  
938 gentle inversion. Following centrifugation for 5 mins at 2000 x g at +4 °C pellets were air dried for 5  
939 mins and resuspended in 100 $\mu$ l of water. gDNA extractions from 24 hpf eggs were performed using  
940 QIAamp DNA Mini Kit (Qiagen) following the instructions from the manufacturer. DNA  
941 concentrations were quantified using a Nanodrop Spectrophotometer (Thermo Fisher Scientific) and  
942 each qPCR reaction was performed in triplicates of 10  $\mu$ l reactions containing 10 ng gDNA for 1 hpf  
943 and 40 ng for 24 hpf eggs, 400 nM of each primer, 200 nM of hydrolysis probe, and 1x TaqMan Fast  
944 Advanced Master Mix (Applied Biosystems, Thermo Fisher Scientific) according to the manufacturer's  
945 instructions in optical plates on a QuantStudio 5 Real-Time PCR system (ThermoFisher Scientific)  
946 equipped with 384-well block. No-template controls for each gene were included for each assay. PCR  
947 cycling conditions were as follows: 50°C for 2 mins, 95 °C for 20 s, 40 cycles at 95 °C for 1 s followed  
948 by an annealing-extension at 60° C for 20 s. Assay efficiencies were at 98 %, Slope: -3.368, R<sup>2</sup>: 0.999  
949 and 100 %, Slope: -3.307, R<sup>2</sup>: 0.998 for *mt-nd5* and *mt-atp6*, respectively. Obtained data were subjected  
950 to independent samples t-test,  $p < 0.05$  (IBM SPSS Statistics Version 19.0.0, Armonk, NY). Sequences  
951 for primers and probes used in these assays are given in **Table S4**.

952

953

954

955 **DECLARATIONS**

956 **Ethics approval and consent to participate:**

957 The animal study was reviewed and approved by the Norwegian Animal Research Authority (permit  
958 number 22921) and the use of these experimental animals was in accordance with the Norwegian  
959 Animal Welfare Act.

960

961

962 **Consent for publication:**

963 Not applicable

964

965 **Availability of data and materials:**

966 The mass spectrometry proteomics data have been deposited to the ProteomeXchange Consortium via  
967 the PRIDE partner repository with the dataset identifier PXD029894 and a project DOI number of  
968 10.6019/PXD029894.

969

970 **Competing interests:**

971 Authors declare they have no competing interests

972

973 **Funding:** This study was supported by the Norwegian Ministry of Trade, Industry and Fisheries  
974 (Project # 15194).

975

976 **Authors' contribution:**

977 OY, BN, AW, FB designed the experiments. AMJ, TH, MM, RMJ, OM, EB, ES, LS performed  
978 experiments. TF built and provided reference database for proteomics experiments. OY wrote the  
979 manuscript with consultation from all authors. All authors read and approved the final manuscript.

980

981 **Acknowledgements:**

982 Not applicable

983 **REFERENCES**

- 984 1. Tarín JJ, García-Pérez MA, Cano A. Assisted reproductive technology results: Why are  
985 live-birth percentages so low?: RESULTS OF ASSISTED REPRODUCTIVE  
986 TECHNOLOGY. *Mol Reprod Dev.* 2014 Jul;81(7):568–83.
- 987 2. Keefe D, Kumar M, Kalmbach K. Oocyte competency is the key to embryo potential.  
988 *Fertil Steril.* 2015 Feb;103(2):317–22.
- 989 3. Kjørsvik E, Meeren T, Kryvi H, Arnfinnson J, Kvenseth PG. Early development of the  
990 digestive tract of cod larvae, *Gadus morhua* L., during start-feeding and starvation. *J*  
991 *Fish Biol.* 1991 Jan;38(1):1–15.
- 992 4. Bobe J, Labbé C. Egg and sperm quality in fish. *Gen Comp Endocrinol.* 2010  
993 Feb;165(3):535–48.
- 994 5. Migaud H, Bell G, Cabrita E, McAndrew B, Davie A, Bobe J, et al. Gamete quality and  
995 broodstock management in temperate fish. *Rev Aquac.* 2013 May;5:S194–223.
- 996 6. Aegerter S, Jalabert B, Bobe J. mRNA stockpile and egg quality in rainbow trout  
997 (*Oncorhynchus mykiss*). *Fish Physiol Biochem.* 2003;28(1–4):317–8.
- 998 7. Bonnet E, Fostier A, Bobe J. Microarray-based analysis of fish egg quality after natural  
999 or controlled ovulation. *BMC Genomics.* 2007 Dec;8(1):55.
- 1000 8. Mommens M, Fernandes JM, Tollefsen K, Johnston IA, Babiak I. Profiling of the  
1001 embryonic Atlantic halibut (*Hippoglossus hippoglossus* L.) transcriptome reveals  
1002 maternal transcripts as potential markers of embryo quality. *BMC Genomics.*  
1003 2014;15(1):829.
- 1004 9. Chapman RW, Reading BJ, Sullivan CV. Ovary Transcriptome Profiling via Artificial  
1005 Intelligence Reveals a Transcriptomic Fingerprint Predicting Egg Quality in Striped  
1006 Bass, *Morone saxatilis*. Craft JA, editor. *PLoS ONE.* 2014 May 12;9(5):e96818.
- 1007 10. Sullivan CV, Chapman RW, Reading BJ, Anderson PE. Transcriptomics of mRNA and  
1008 egg quality in farmed fish: Some recent developments and future directions. *Gen Comp*  
1009 *Endocrinol.* 2015 Sep;221:23–30.
- 1010 11. Żarski D, Nguyen T, Le Cam A, Montfort J, Dutto G, Vidal MO, et al. Transcriptomic  
1011 Profiling of Egg Quality in Sea Bass (*Dicentrarchus labrax*) Sheds Light on Genes  
1012 Involved in Ubiquitination and Translation. *Mar Biotechnol.* 2017 Feb;19(1):102–15.
- 1013 12. Cheung CT, Nguyen T, Le Cam A, Patinote A, Journot L, Reynes C, et al. What makes a  
1014 bad egg? Egg transcriptome reveals dysregulation of translational machinery and novel  
1015 fertility genes important for fertilization. *BMC Genomics.* 2019 Dec;20(1):584.
- 1016 13. Ma H, Martin K, Dixon D, Hernandez AG, Weber GM. Transcriptome analysis of egg  
1017 viability in rainbow trout, *Oncorhynchus mykiss*. *BMC Genomics.* 2019 Dec;20(1):319.
- 1018 14. Tadros W, Lipshitz HD. The maternal-to-zygotic transition: a play in two acts.  
1019 *Development.* 2009 Sep 15;136(18):3033–42.

- 1020 15. Jukam D, Shariati SAM, Skotheim JM. Zygotic genome activation in vertebrates.  
1021 2018;33.
- 1022 16. Groh KJ, Nesatyy VJ, Segner H, Eggen RIL, Suter MJ-F. Global proteomics analysis of  
1023 testis and ovary in adult zebrafish (*Danio rerio*). *Fish Physiol Biochem*. 2011  
1024 Sep;37(3):619–47.
- 1025 17. Chapovetsky V, Gattegno T, Admon A. Proteomics analysis of the developing fish  
1026 oocyte. In: Babin PJ, Cerdà J, Lubzens E, editors. *The Fish Oocyte*. Dordrecht: Springer  
1027 Netherlands; 2007. p. 99–111. Available from: [http://link.springer.com/10.1007/978-1-](http://link.springer.com/10.1007/978-1-4020-6235-3_4)  
1028 4020-6235-3\_4
- 1029 18. Rime H, Guitton N, Pineau C, Bonnet E, Bobe J, Jalabert B. Post-ovulatory ageing and  
1030 egg quality: A proteomic analysis of rainbow trout coelomic fluid. *Reprod Biol*  
1031 *Endocrinol*. 2004;10.
- 1032 19. Crespel A, Rime H, Fraboulet E, Bobe J, Fauvel C. Egg quality in domesticated and wild  
1033 seabass (*Dicentrarchus labrax*): A proteomic analysis. :1.
- 1034 20. Castets M-D, Schaerlinger B, Silvestre F, Gardeur J-N, Dieu M, Corbier C, et al.  
1035 Combined analysis of *Perca fluviatilis* reproductive performance and oocyte proteomic  
1036 profile. *Theriogenology*. 2012 Jul;78(2):432-442.e13.
- 1037 21. Kohn YY, Symonds JE, Kleffmann T, Nakagawa S, Lagisz M, Lokman PM. Proteomic  
1038 analysis of early-stage embryos: implications for egg quality in hapuku (*Polyprion*  
1039 *oxygeneios*). *Fish Physiol Biochem*. 2015 Dec;41(6):1403–17.
- 1040 22. Yilmaz O, Patinote A, Nguyen TV, Com E, Lavigne R, Pineau C, et al. Scrambled eggs:  
1041 Proteomic portraits and novel biomarkers of egg quality in zebrafish (*Danio rerio*).  
1042 Jacobs JM, editor. *PLOS ONE*. 2017 Nov 16;12(11):e0188084.
- 1043 23. Yilmaz O, Patinote A, Nguyen T, Com E, Pineau C, Bobe J. Genome editing reveals  
1044 reproductive and developmental dependencies on specific types of vitellogenin in  
1045 zebrafish (*Danio rerio*). *Mol Reprod Dev*. 2019 Sep;86(9):1168–88.
- 1046 24. Yilmaz O, Patinote A, Com E, Pineau C, Bobe J. Knock out of specific maternal  
1047 vitellogenins in zebrafish (*Danio rerio*) evokes vital changes in egg proteomic profiles  
1048 that resemble the phenotype of poor quality eggs. *BMC Genomics*. 2021 Dec;22(1):308.
- 1049 25. Buszczak M, Signer RAJ, Morrison SJ. Cellular Differences in Protein Synthesis  
1050 Regulate Tissue Homeostasis. *Cell*. 2014 Oct;159(2):242–51.
- 1051 26. Pousis C, Mylonas CC, De Virgilio C, Gadaleta G, Santamaria N, Passantino L, et al. The  
1052 observed oogenesis impairment in greater amberjack *Seriola dumerili* (Risso, 1810)  
1053 reared in captivity is not related to an insufficient liver transcription or oocyte uptake of  
1054 vitellogenin. *Aquac Res*. 2018 Jan;49(1):243–52.
- 1055 27. Yilmaz O, Patinote A, Nguyen T, Bobe J. Multiple vitellogenins in zebrafish (*Danio*  
1056 *rerio*): quantitative inventory of genes, transcripts and proteins, and relation to egg  
1057 quality. *Fish Physiol Biochem*. 2018 Dec;44(6):1509–25.

- 1058 28. Latham KE. Endoplasmic Reticulum Stress Signaling in Mammalian Oocytes and  
1059 Embryos: Life in Balance. In: International Review of Cell and Molecular Biology.  
1060 Elsevier; 2015 [cited 2021 Dec 18. p. 227–65. Available from:  
1061 <https://linkinghub.elsevier.com/retrieve/pii/S1937644815000064>
- 1062 29. St. John J. The control of mtDNA replication during differentiation and development.  
1063 *Biochim Biophys Acta BBA - Gen Subj.* 2014 Apr;1840(4):1345–54.
- 1064 30. Babayev E, Seli E. Oocyte mitochondrial function and reproduction. *Curr Opin Obstet*  
1065 *Gynecol.* 2015 Jun;27(3):175–81.
- 1066 31. Artuso L, Romano A, Verri T, Domenichini A, Argenton F, Santorelli FM, et al.  
1067 Mitochondrial DNA metabolism in early development of zebrafish (*Danio rerio*).  
1068 *Biochim Biophys Acta BBA - Bioenerg.* 2012 Jul;1817(7):1002–11.
- 1069 32. Chappel S. The Role of Mitochondria from Mature Oocyte to Viable Blastocyst. *Obstet*  
1070 *Gynecol Int.* 2013;2013:1–10.
- 1071 33. Ge H, Tollner TL, Hu Z, Dai M, Li X, Guan H, et al. The importance of mitochondrial  
1072 metabolic activity and mitochondrial DNA replication during oocyte maturation in vitro  
1073 on oocyte quality and subsequent embryo developmental competence. *Mol Reprod Dev.*  
1074 2012 Jun;79(6):392–401.
- 1075 34. Chen H, Chan DC. Physiological functions of mitochondrial fusion. *Ann N Y Acad Sci.*  
1076 2010;1201(1):21–5.
- 1077 35. Youle RJ, van der Bliek AM. Mitochondrial Fission, Fusion, and Stress. *Science.* 2012  
1078 Aug 31;337(6098):1062–5.
- 1079 36. Rugarli EI, Langer T. Mitochondrial quality control: a matter of life and death for  
1080 neurons. *EMBO J.* 2012 Mar 21;31(6):1336–49.
- 1081 37. Labbadia J, Morimoto RI. Huntington’s disease: underlying molecular mechanisms and  
1082 emerging concepts. *Trends Biochem Sci.* 2013 Aug;38(8):378–85.
- 1083 38. Tublin JM, Adelstein JM, del Monte F, Combs CK, Wold LE. Getting to the Heart of  
1084 Alzheimer Disease. *Circ Res.* 2019 Jan 4;124(1):142–9.
- 1085 39. Williams AJ, Paulson HL. Polyglutamine neurodegeneration: protein misfolding  
1086 revisited. *Trends Neurosci.* 2008 Oct;31(10):521–8.
- 1087 40. Diez-Juan A, Rubio C, Marin C, Martinez S, Al-Asmar N, Riboldi M, et al.  
1088 Mitochondrial DNA content as a viability score in human euploid embryos: less is  
1089 better. *Fertil Steril.* 2015 Sep;104(3):534-541.e1.
- 1090 41. Fragouli E, Spath K, Alfarawati S, Kaper F, Craig A, Michel C-E, et al. Altered Levels of  
1091 Mitochondrial DNA Are Associated with Female Age, Aneuploidy, and Provide an  
1092 Independent Measure of Embryonic Implantation Potential. Kim SK, editor. *PLOS*  
1093 *Genet.* 2015 Jun 3;11(6):e1005241.
- 1094 42. Kim J, Seli E. Mitochondria as a biomarker for IVF outcome. *Reproduction.* 2019  
1095 Jun;157(6):R235–42.



- 1096 43. Treff NR, Zhan Y, Tao X, Olcha M, Han M, Rajchel J, et al. Levels of trophectoderm  
1097 mitochondrial DNA do not predict the reproductive potential of sibling embryos. *Hum*  
1098 *Reprod.* 2017 Feb 23;1–9.
- 1099 44. Victor AR, Brake AJ, Tyndall JC, Griffin DK, Zouves CG, Barnes FL, et al. Accurate  
1100 quantitation of mitochondrial DNA reveals uniform levels in human blastocysts  
1101 irrespective of ploidy, age, or implantation potential. *Fertil Steril.* 2017 Jan;107(1):34-  
1102 42.e3.
- 1103 45. Klimczak AM, Pacheco LE, Lewis KE, Massahi N, Richards JP, Kearns WG, et al.  
1104 Embryonal mitochondrial DNA: relationship to embryo quality and transfer outcomes. *J*  
1105 *Assist Reprod Genet.* 2018 May;35(5):871–7.
- 1106 46. Scott RT, Sun L, Zhan Y, Marin D, Tao X, Seli E. Mitochondrial DNA content is not  
1107 predictive of reproductive competence in euploid blastocysts. *Reprod Biomed Online.*  
1108 2020 Aug;41(2):183–90.
- 1109 47. Monnot S, Samuels DC, Hesters L, Frydman N, Gigarel N, Burlet P, et al. Mutation  
1110 dependance of the mitochondrial DNA copy number in the first stages of human  
1111 embryogenesis. *Hum Mol Genet.* 2013 May 1;22(9):1867–72.
- 1112 48. Berge T, Eriksson A, Brorson IS, Høgestøl EA, Berg-Hansen P, Døskeland A, et al.  
1113 Quantitative proteomic analyses of CD4+ and CD8+ T cells reveal differentially  
1114 expressed proteins in multiple sclerosis patients and healthy controls. *Clin Proteomics.*  
1115 2019 Dec;16(1):19.
- 1116 49. Hughes CS, Moggridge S, Müller T, Sorensen PH, Morin GB, Krijgsveld J. Single-pot,  
1117 solid-phase-enhanced sample preparation for proteomics experiments. *Nat Protoc.* 2019  
1118 Jan;14(1):68–85.
- 1119 50. Yadetie F, Karlsen O, Eide M, Hogstrand C, Goksøyr A. Liver transcriptome analysis of  
1120 Atlantic cod (*Gadus morhua*) exposed to PCB 153 indicates effects on cell cycle  
1121 regulation and lipid metabolism. *BMC Genomics.* 2014;15(1):481.
- 1122 51. Perez-Riverol Y, Csordas A, Bai J, Bernal-Llinares M, Hewapathirana S, Kundu DJ, et  
1123 al. The PRIDE database and related tools and resources in 2019: improving support for  
1124 quantification data. *Nucleic Acids Res.* 2019 Jan 8;47(D1):D442–50.
- 1125 52. Liao Y, Wang J, Jaehnig EJ, Shi Z, Zhang B. WebGestalt 2019: gene set analysis toolkit  
1126 with revamped UIs and APIs. *Nucleic Acids Res.* 2019 Jul 2;47(W1):W199–205.
- 1127 53. Szklarczyk D, Franceschini A, Wyder S, Forslund K, Heller D, Huerta-Cepas J, et al.  
1128 STRING v10: protein–protein interaction networks, integrated over the tree of life.  
1129 *Nucleic Acids Res.* 2015 Jan 28;43(D1):D447–52.
- 1130 54. Lange V, Picotti P, Domon B, Aebersold R. Selected reaction monitoring for quantitative  
1131 proteomics: a tutorial. *Mol Syst Biol.* 2008 Jan;4(1):222.
- 1132 55. Liebler DC, Zimmerman LJ. Targeted Quantitation of Proteins by Mass Spectrometry.  
1133 *Biochemistry.* 2013 Jun 4;52(22):3797–806.

- 1134 56. Hoofnagle AN, Whiteaker JR, Carr SA, Kuhn E, Liu T, Massoni SA, et al.  
1135 Recommendations for the Generation, Quantification, Storage, and Handling of Peptides  
1136 Used for Mass Spectrometry–Based Assays. *Clin Chem*. 2016 Jan 1;62(1):48–69.
- 1137 57. Chiva C, Sabidó E. Peptide Selection for Targeted Protein Quantitation. *J Proteome Res*.  
1138 2017 Mar 3;16(3):1376–80.
- 1139 58. MacLean B, Tomazela DM, Shulman N, Chambers M, Finney GL, Frewen B, et al.  
1140 Skyline: an open source document editor for creating and analyzing targeted proteomics  
1141 experiments. *Bioinformatics*. 2010 Apr 1;26(7):966–8.
- 1142 59. Karnovsky M J. A formaldehyde-glutaraldehyde fixative of high osmolality for use in  
1143 electron microscopy. *J. Cell Biol*. 1965; 27:137-8A.
- 1144
